# Supplementary material
Source: PubMed Central journal article supplement (PMC4227548)
Supplement: pr500591e_si_001.pdf [file pr500591e_si_001.pdf]

# Glycan No 1

Precursor =  $m/z$  698.2<sup>2-</sup>

[M-H]<sup>1-</sup> = 1397.4 Da

LC retention time = 39.4 min

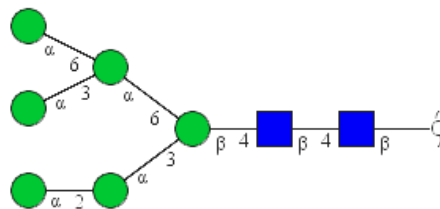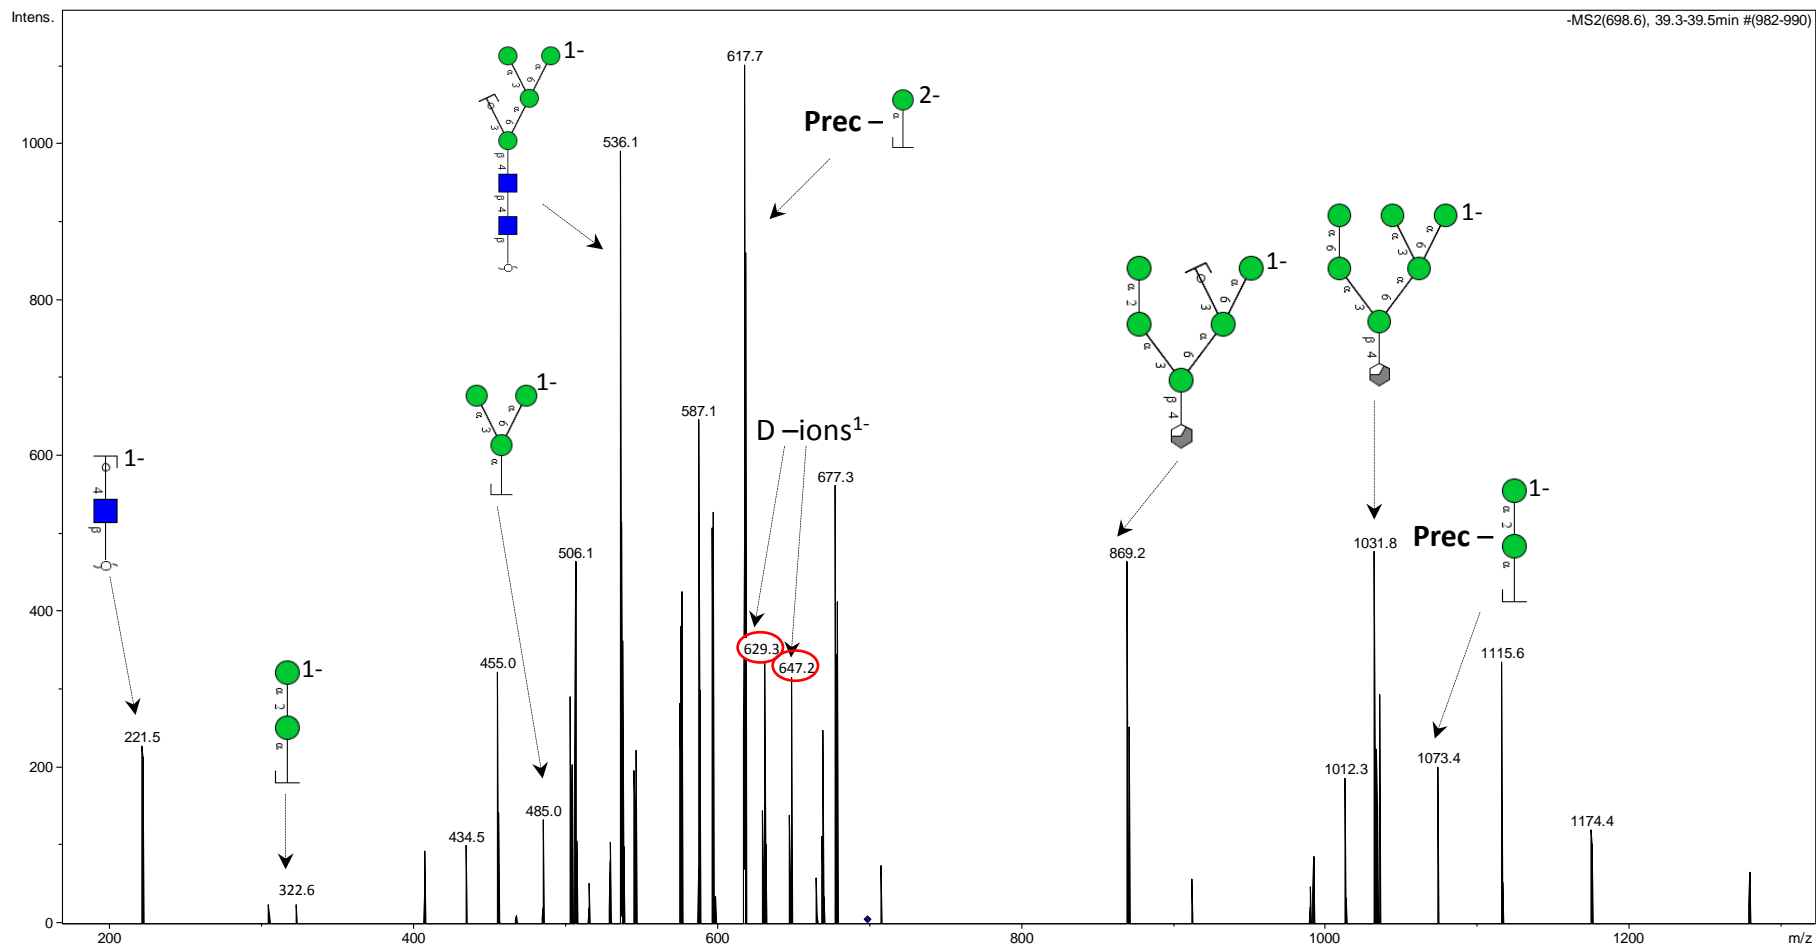

Positive match to MS2 spectrum in UniCarbKB

# Glycan No 2

Precursor =  $m/z$  779.3<sup>2-</sup>

[M-H]<sup>1-</sup> = 1559.6 Da

LC retention time = 37.5 min

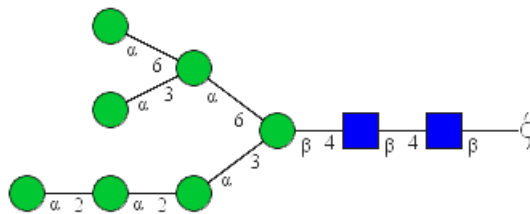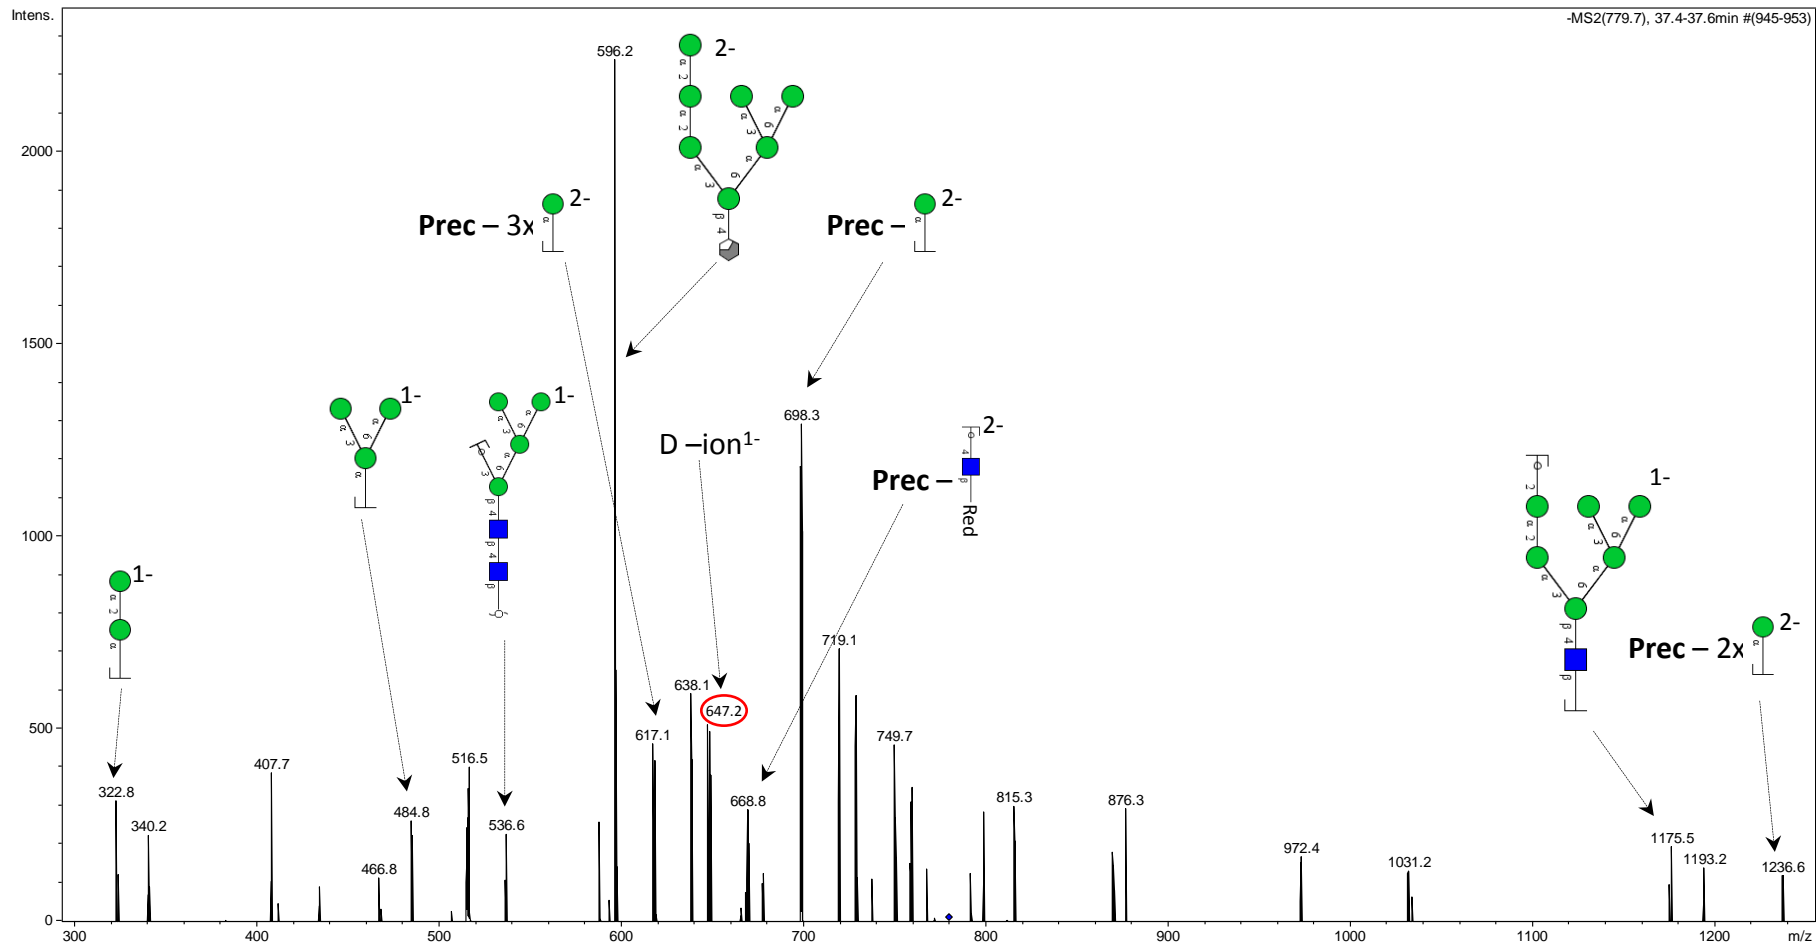

Positive match to MS2 spectrum in UniCarbKB

# Glycan No 3

Precursor =  $m/z$  820.4<sup>2-</sup>

$[M-H]^{1-}$  = 1641.8 Da

LC retention time = 44.1 min

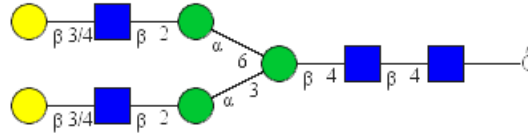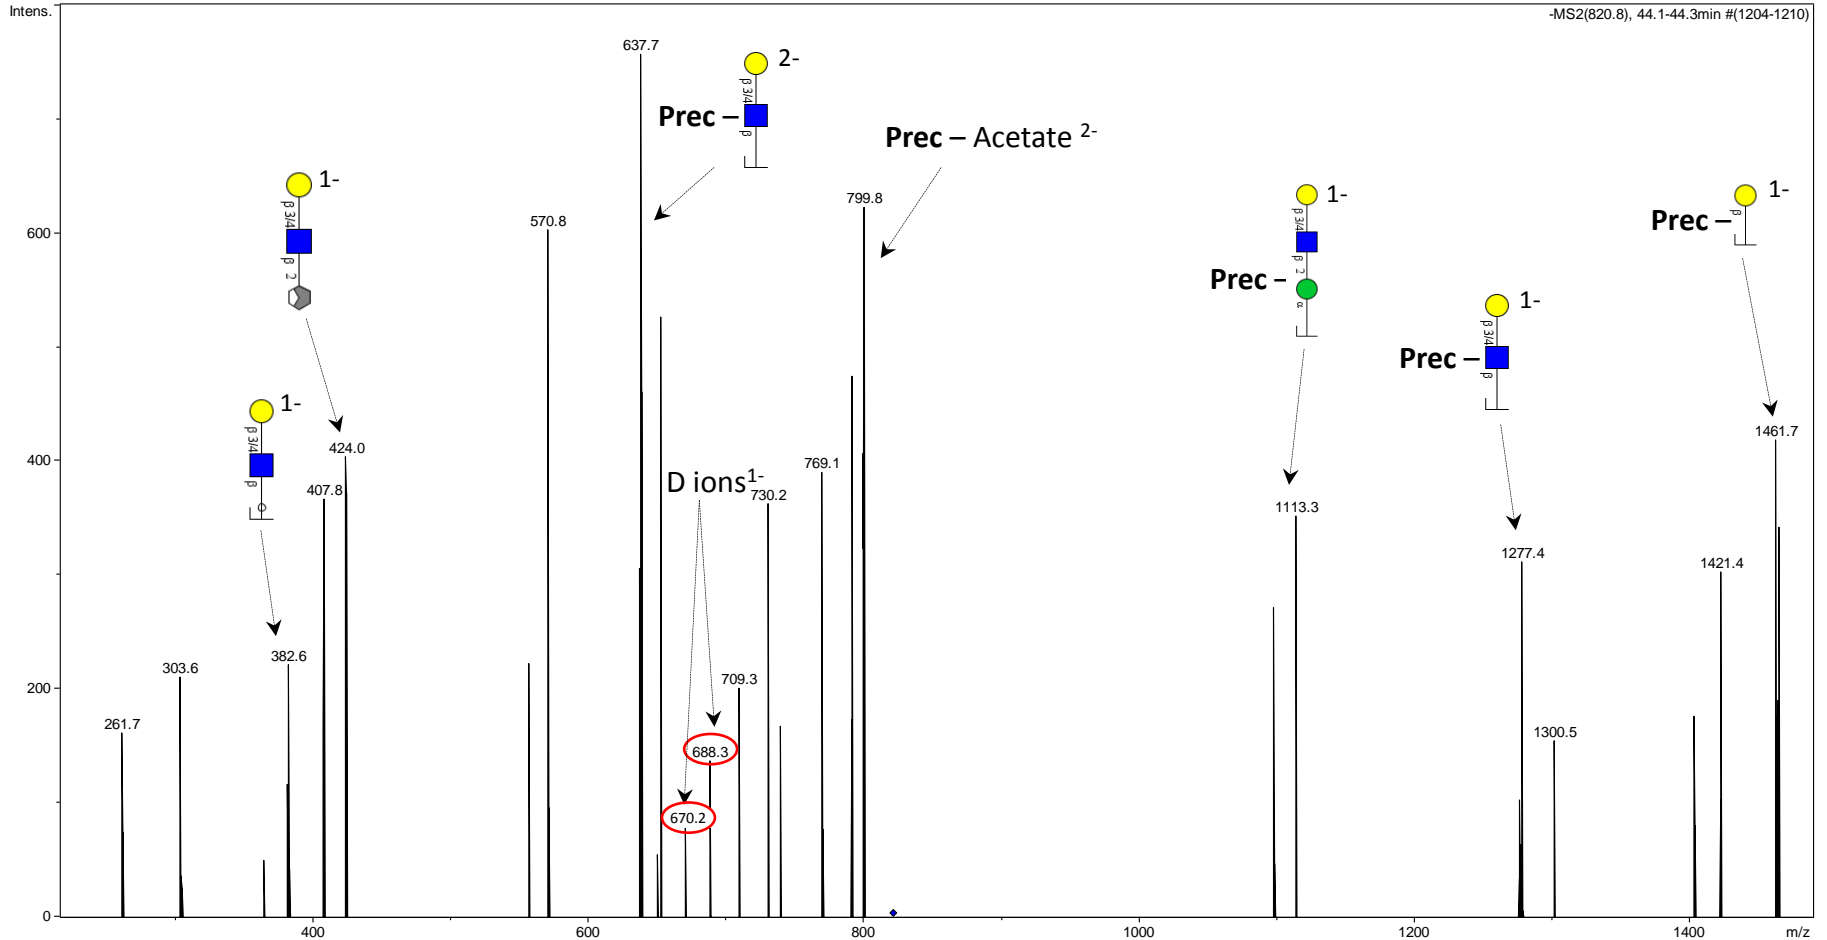

Positive match to MS2 spectrum in UniCarbKB

Glycan No 4

Precursor =  $m/z$  860.3<sup>2-</sup>

[M-H]<sup>1-</sup> = 1721.6 Da

LC retention time = 38.4 min

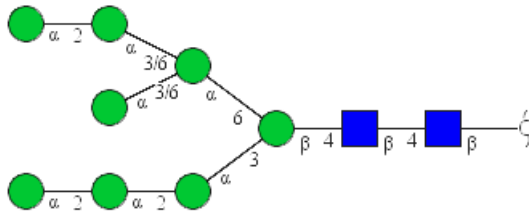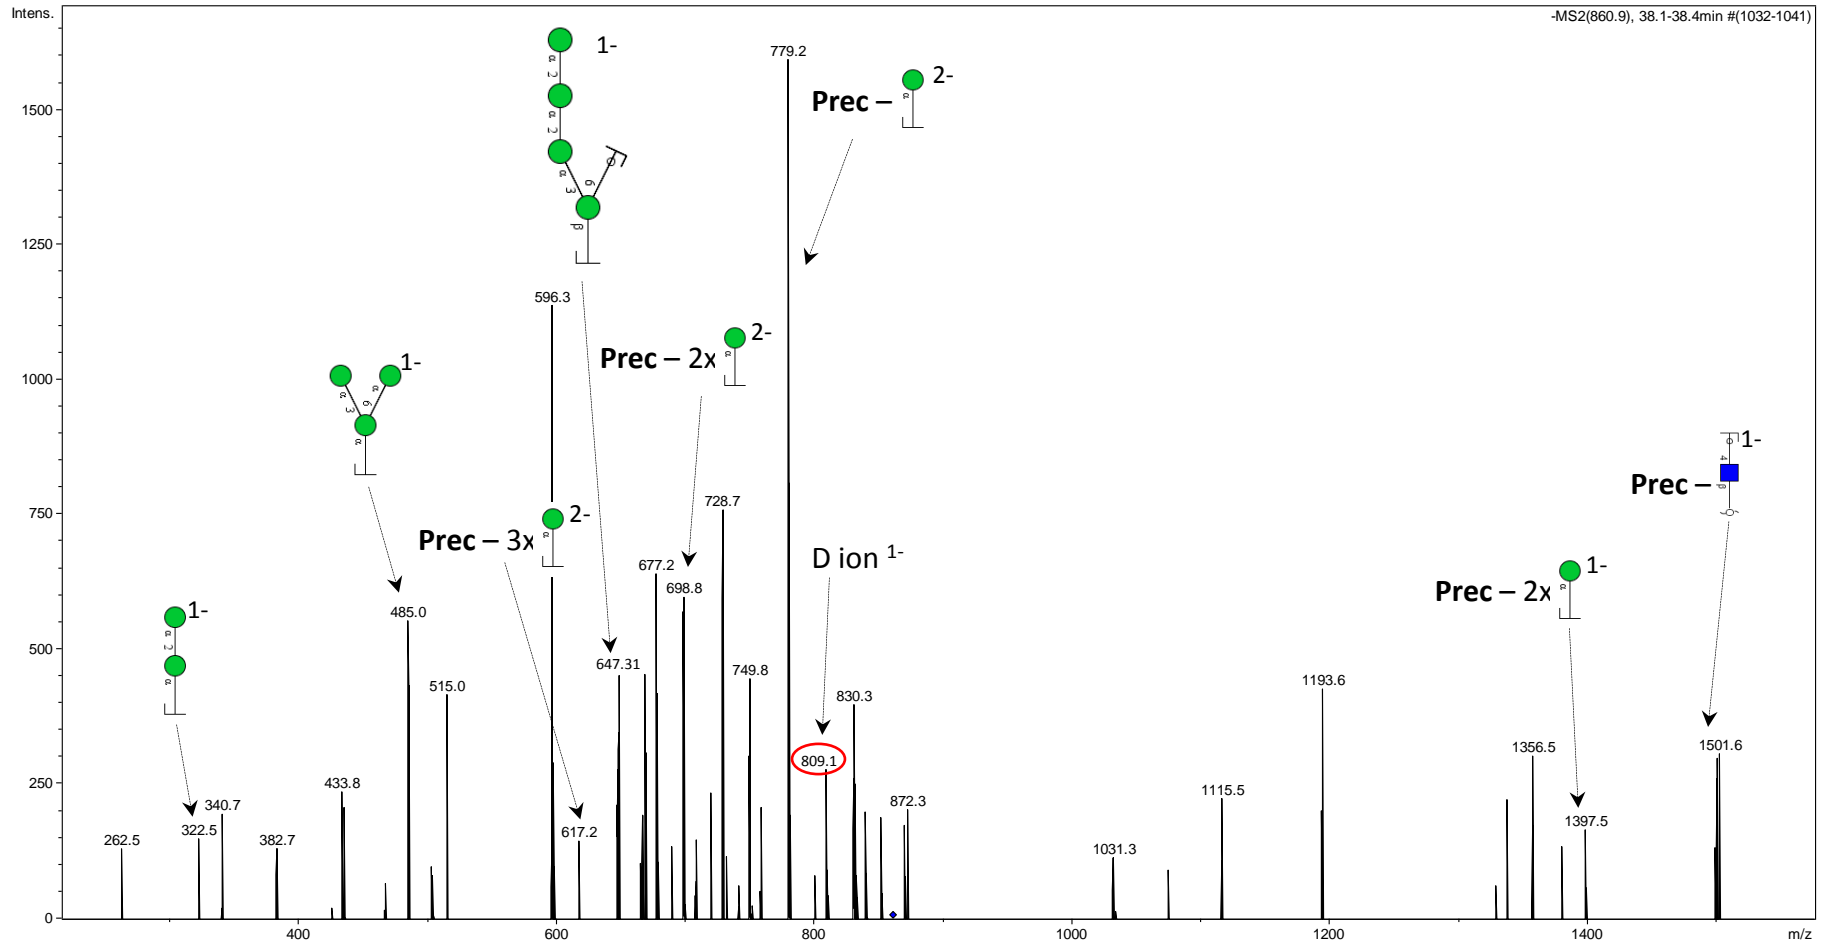

Positive match to MS2 spectrum in UniCarbKB

# Glycan No 5

Precursor =  $m/z$  864.4<sup>2-</sup>

$[M-H]^{1-}$  = 1729.8 Da

LC retention time = 41.0 min

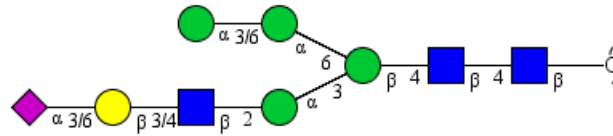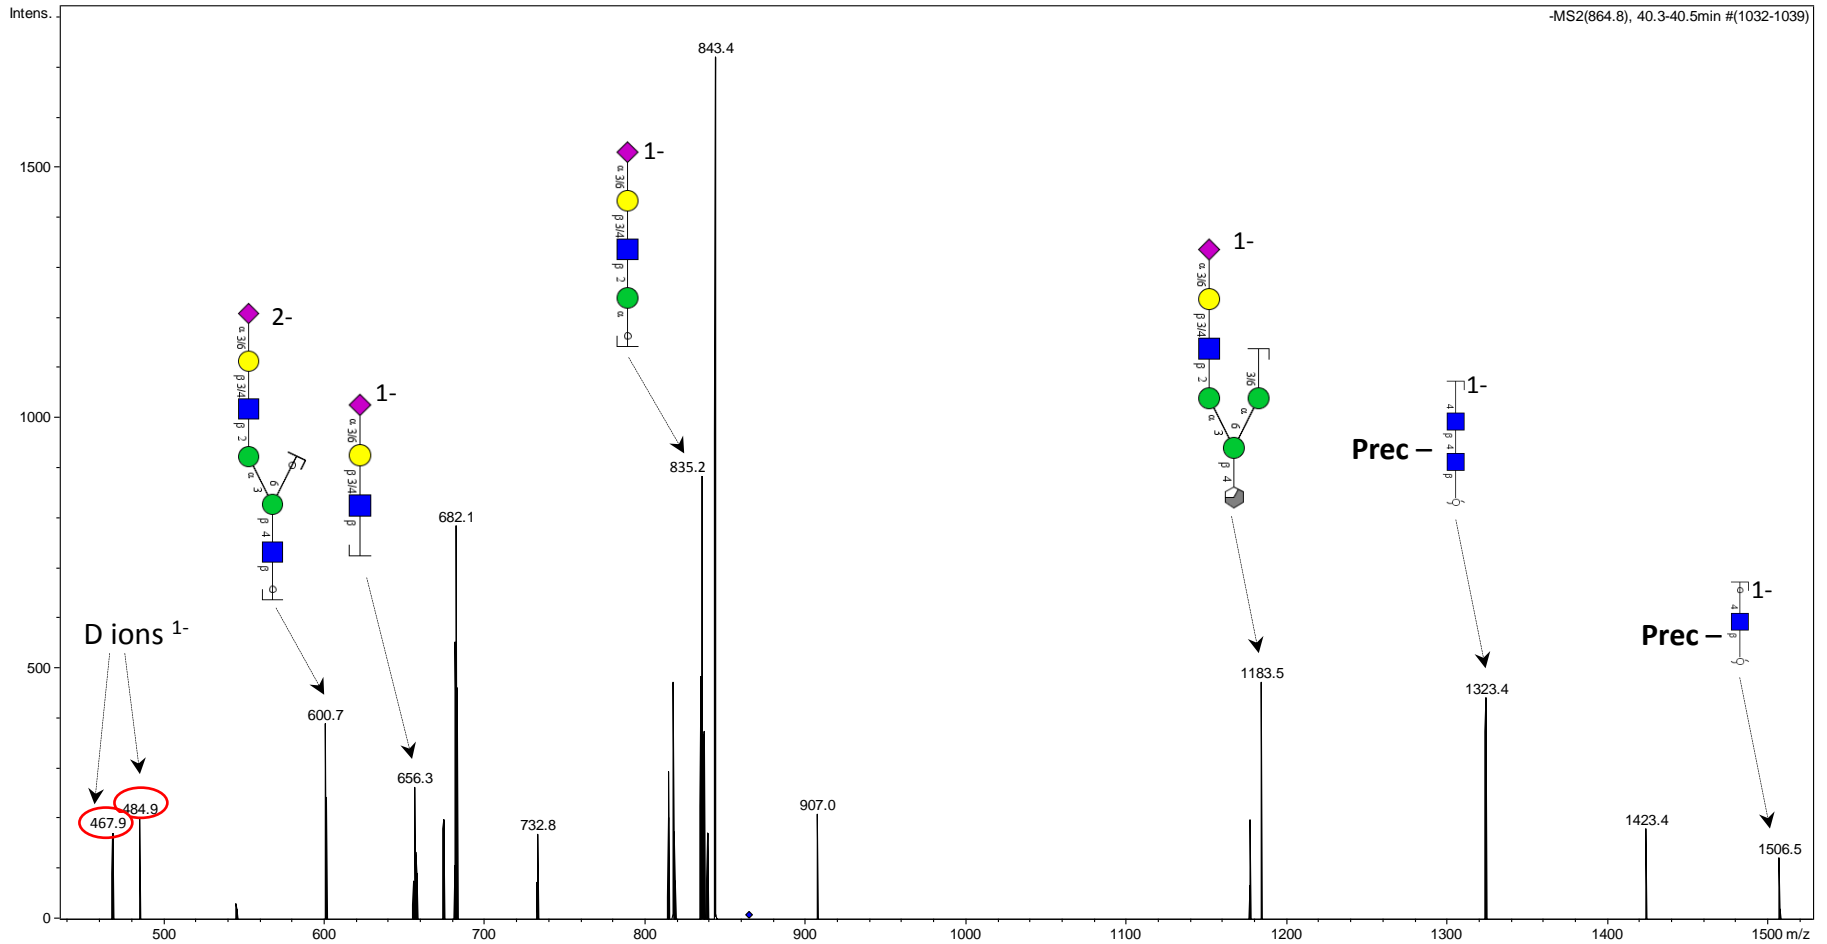

Positive match to MS2 spectrum in UniCarbKB

# Glycan No 6

Precursor =  $m/z$  884.8<sup>2-</sup>

[M-H]<sup>1-</sup> = 1770.6 Da

LC retention time = 43.7 min

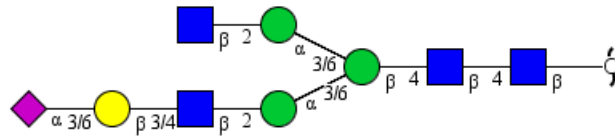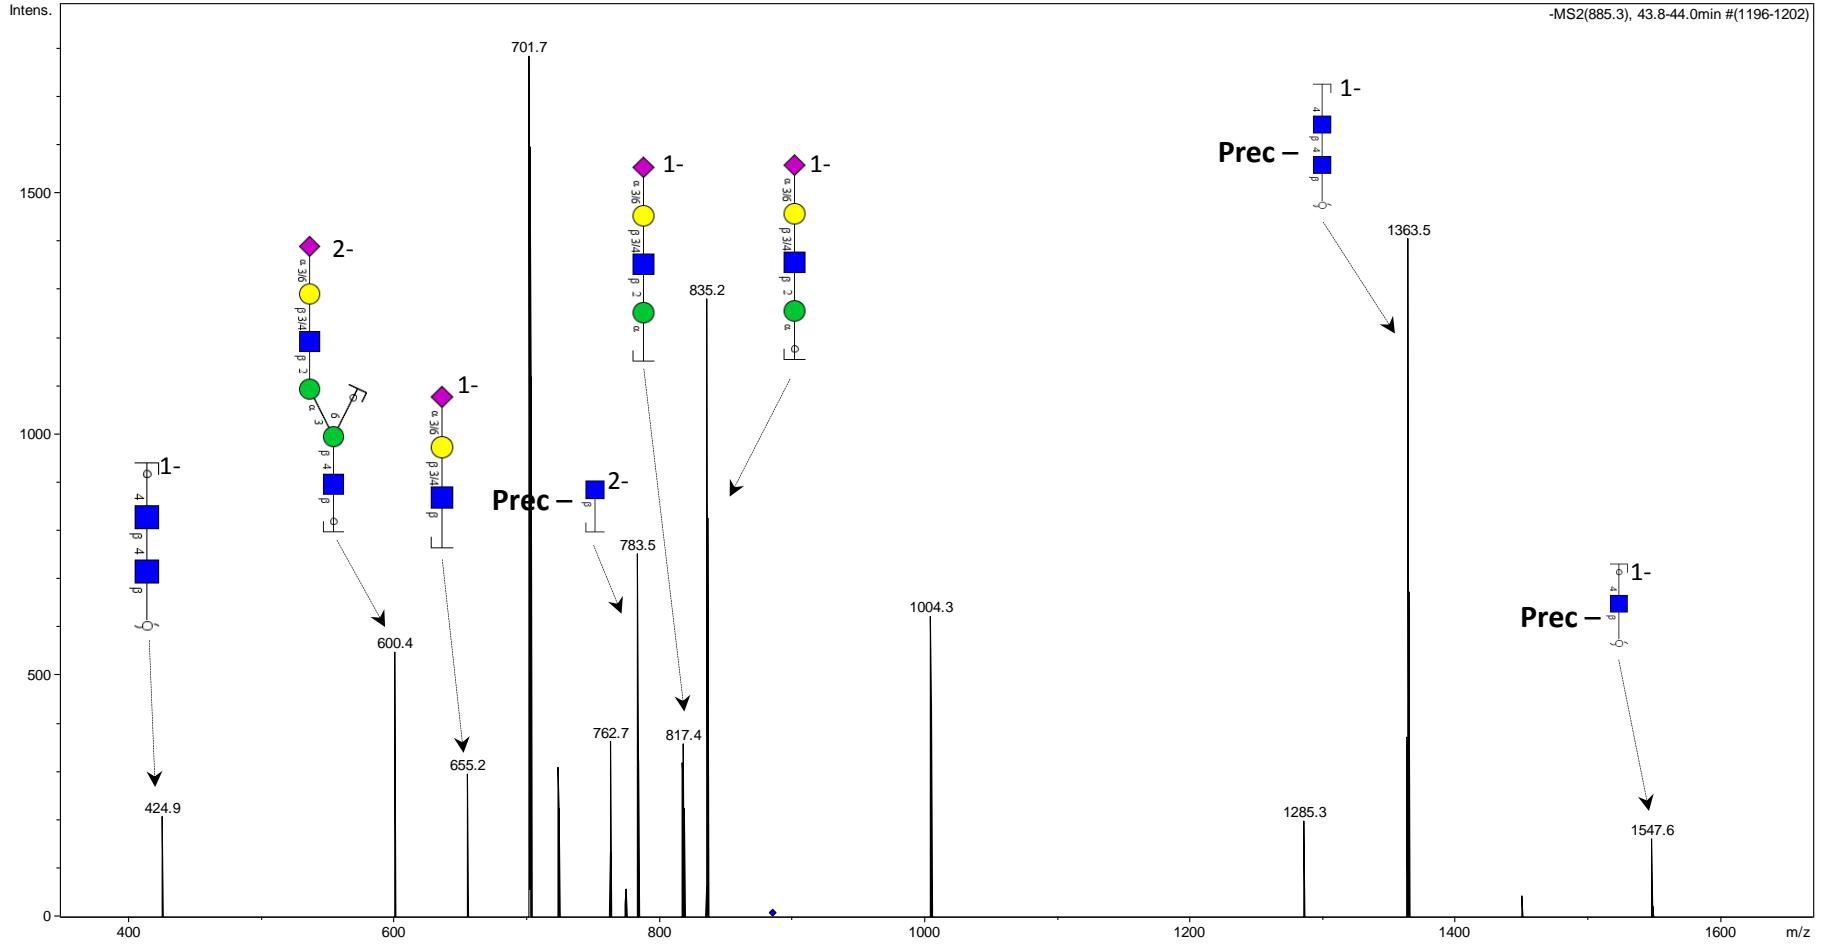

# Glycan No 7

Precursor =  $m/z$  893.3<sup>2-</sup>

[M-H]<sup>1-</sup> = 1787.6 Da

LC retention time = 49.0 min

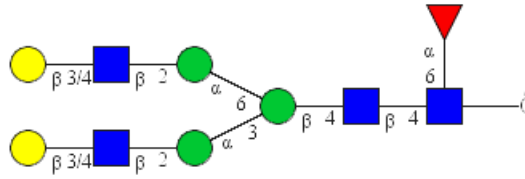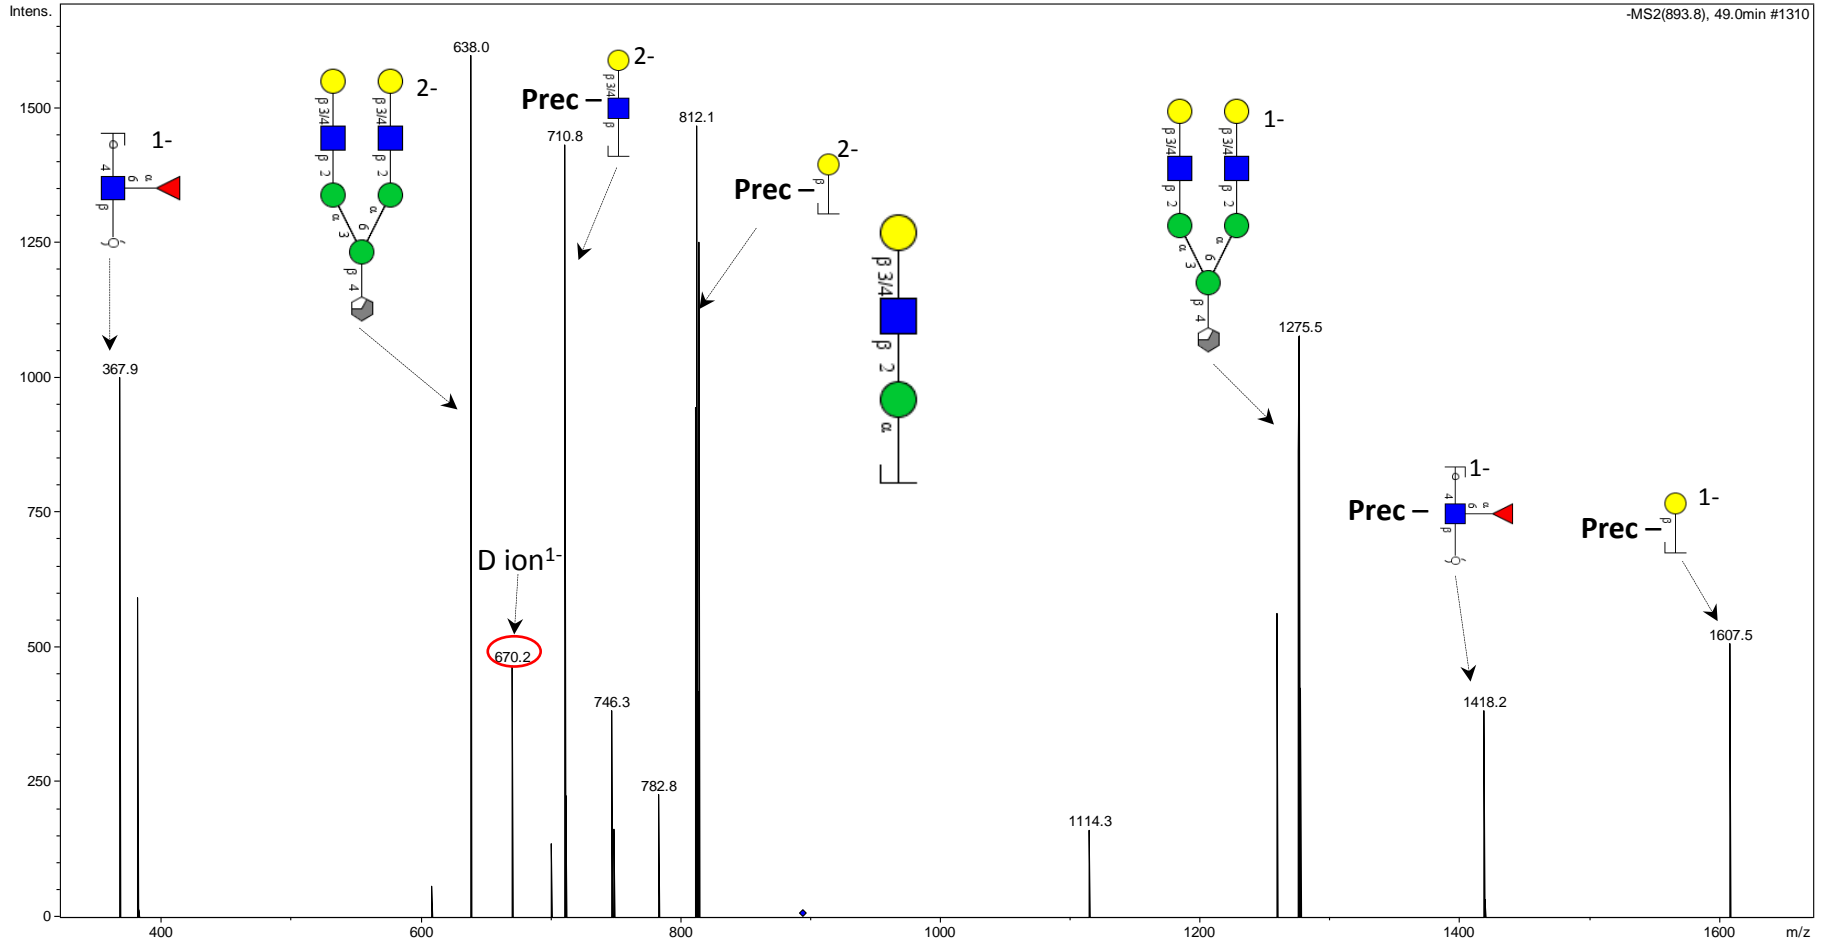

Positive match to MS2 spectrum in UniCarbKB











Glycan No 10c

Precursor =  $m/z$  965.9<sup>2-</sup>

[M-H]<sup>1-</sup> = 1932.8Da

LC retention time = 52.3 min

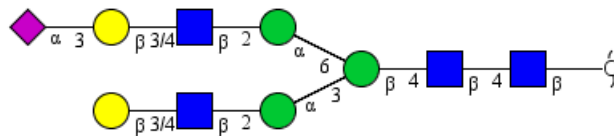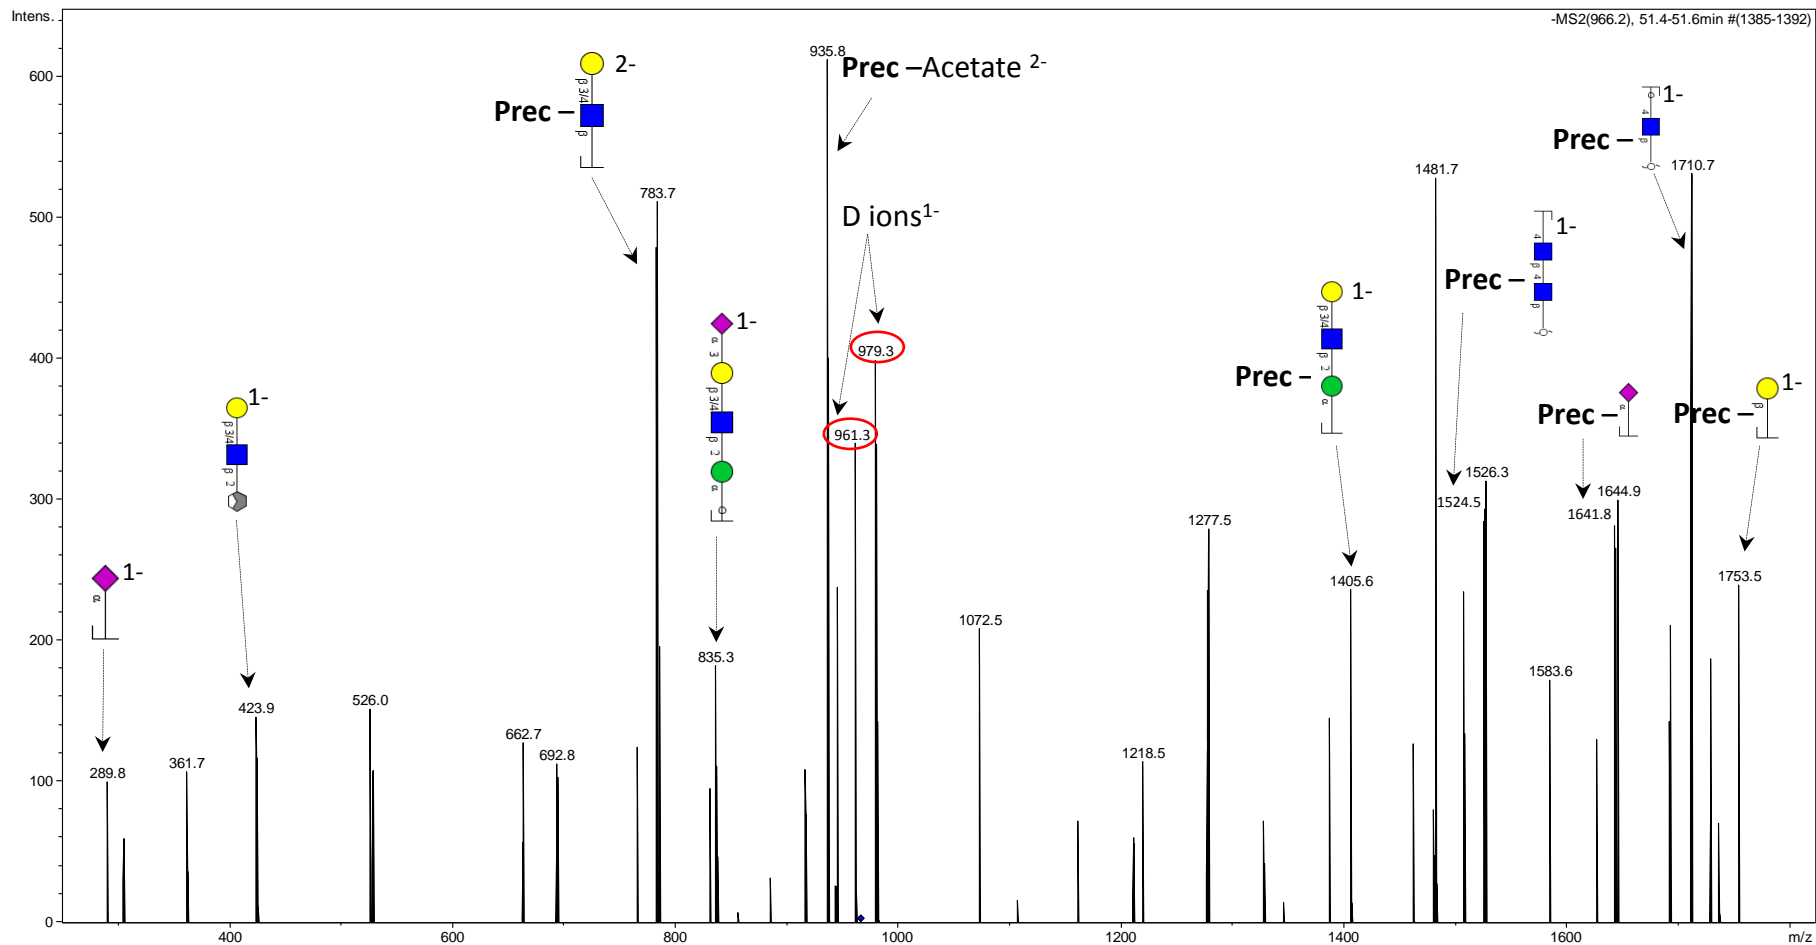

Positive match to MS2 spectrum in UniCarbKB

# Glycan No 11

Precursor =  $m/z$  994.9<sup>2-</sup>

[M-H]<sup>1-</sup> = 1990.8 Da

LC retention time = 40.7 min

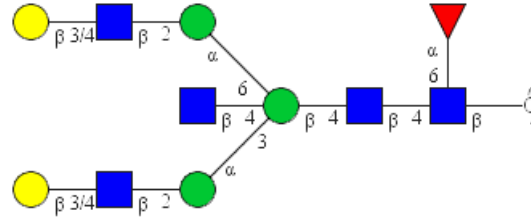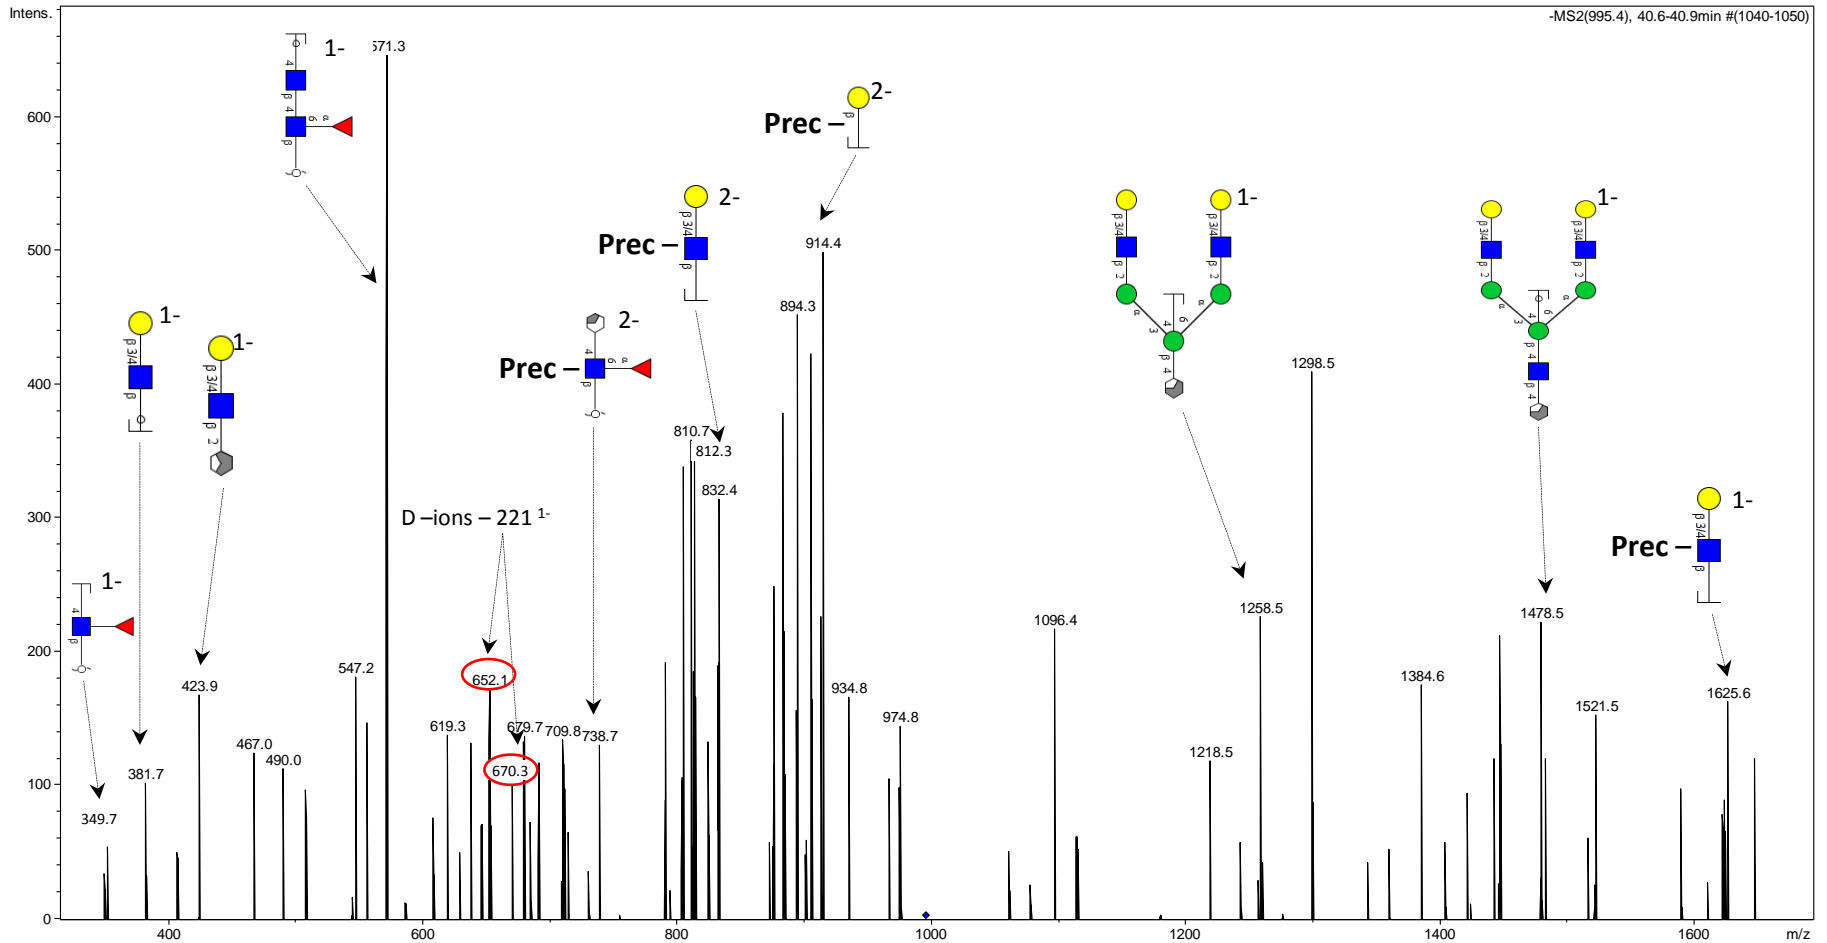

Positive match to MS2 spectrum in UniCarbKB

# Glycan No 12

Precursor =  $m/z$  1022.4<sup>2-</sup>

$[M-H]^{1-}$  = 2045.8 Da

LC retention time = 40.3 min

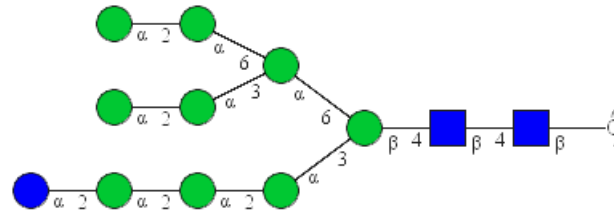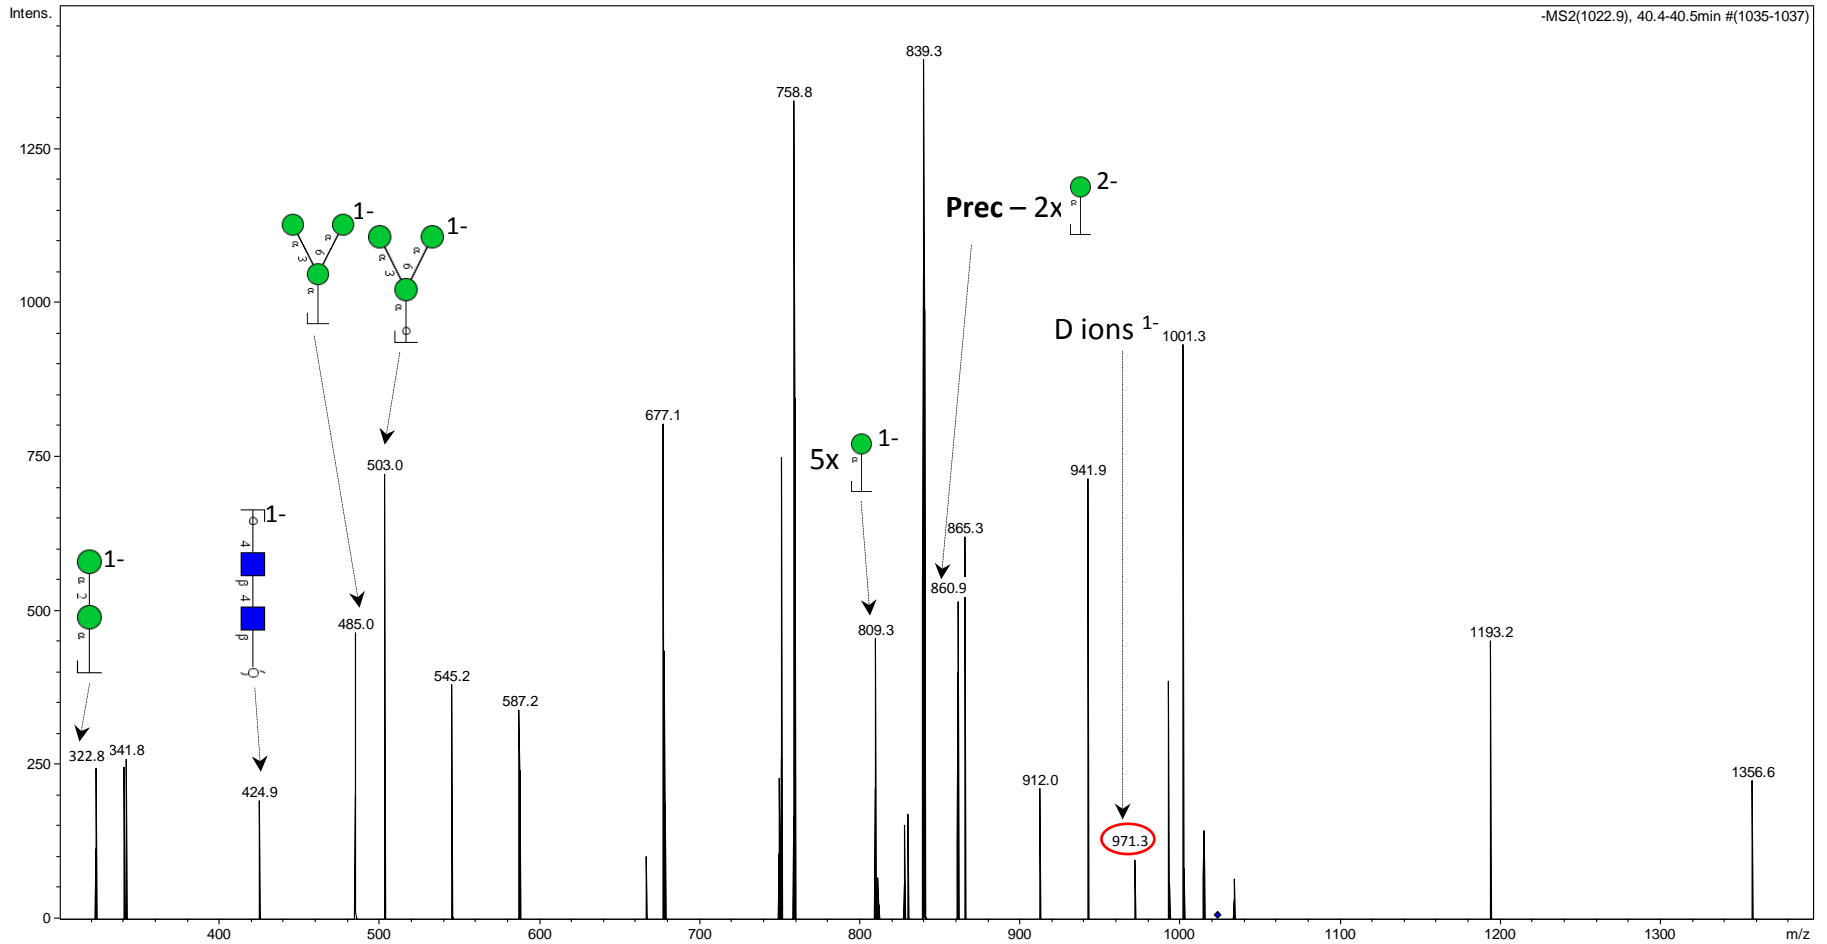

Positive match to MS2 spectrum in UniCarbKB



Glycan No 13b

Precursor =  $m/z$  1038.9<sup>2-</sup>

[M-H]<sup>1-</sup> = 2078.8 Da

LC retention time = 48.3 min

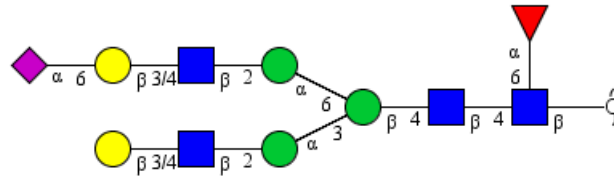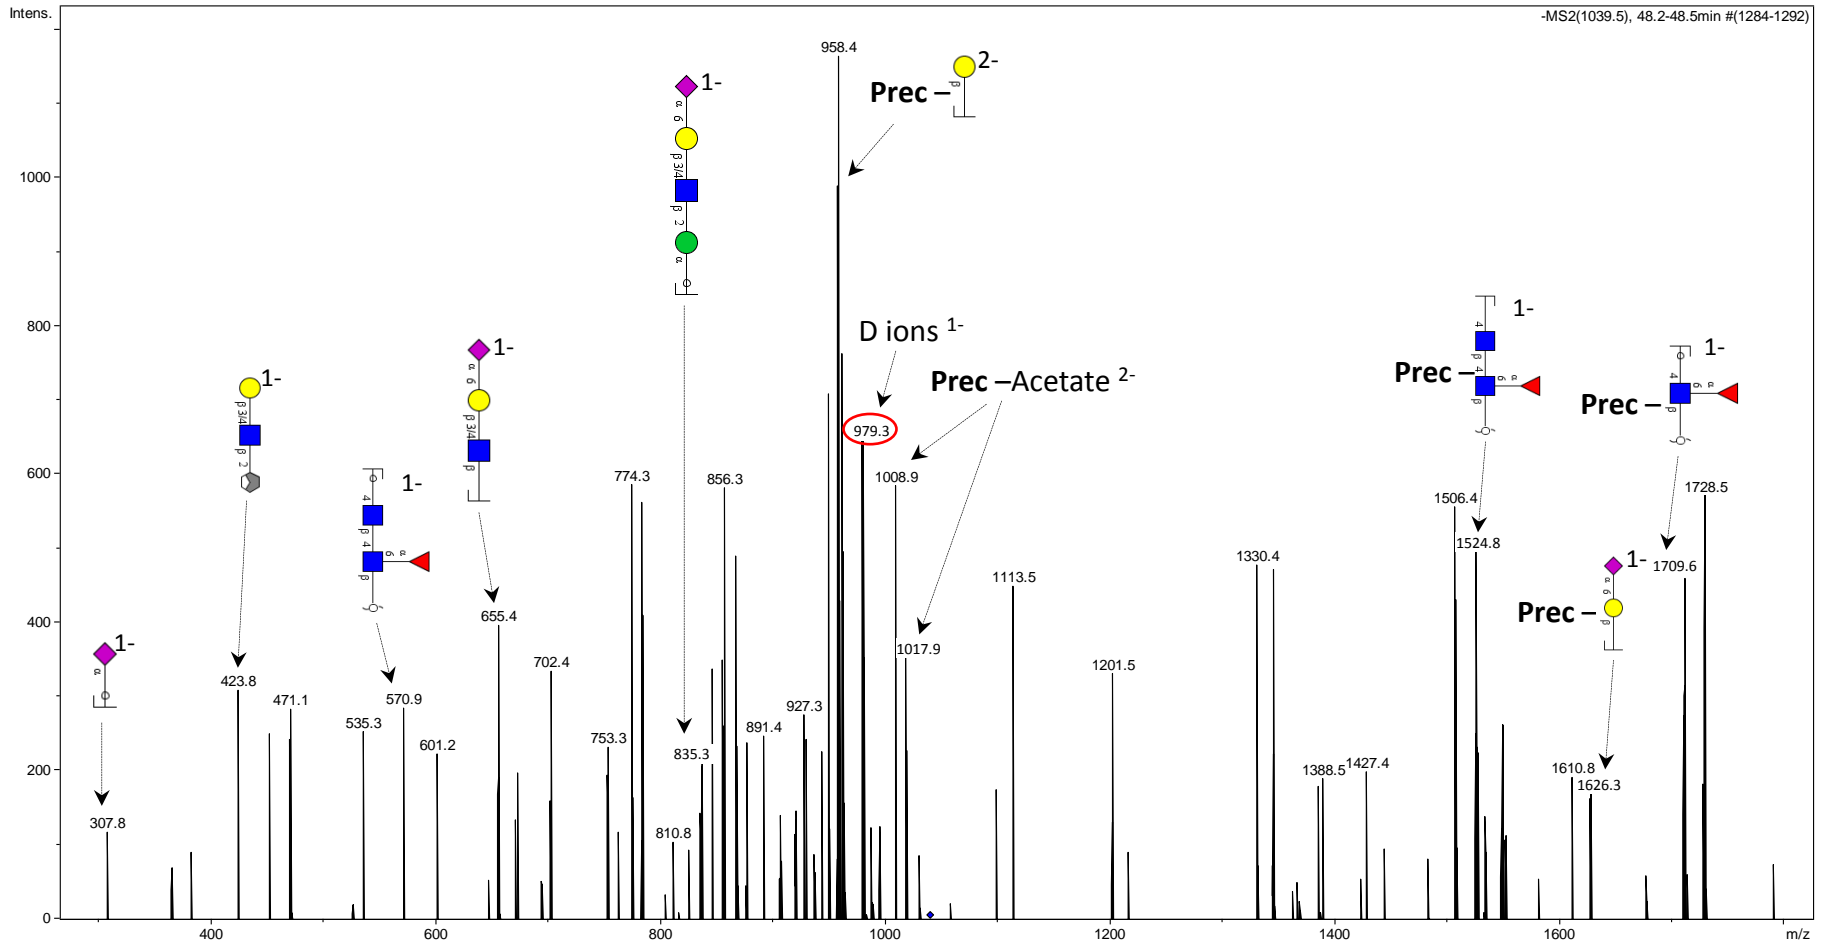

Positive match to MS2 spectrum in UniCarbKB



Glycan No 13c

Precursor =  $m/z$  1038.9<sup>2-</sup>

$[M-H]^{1-}$  = 2078.8 Da

LC retention time = 49.2 min

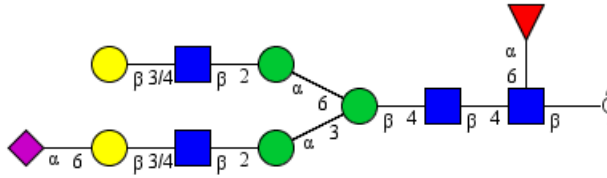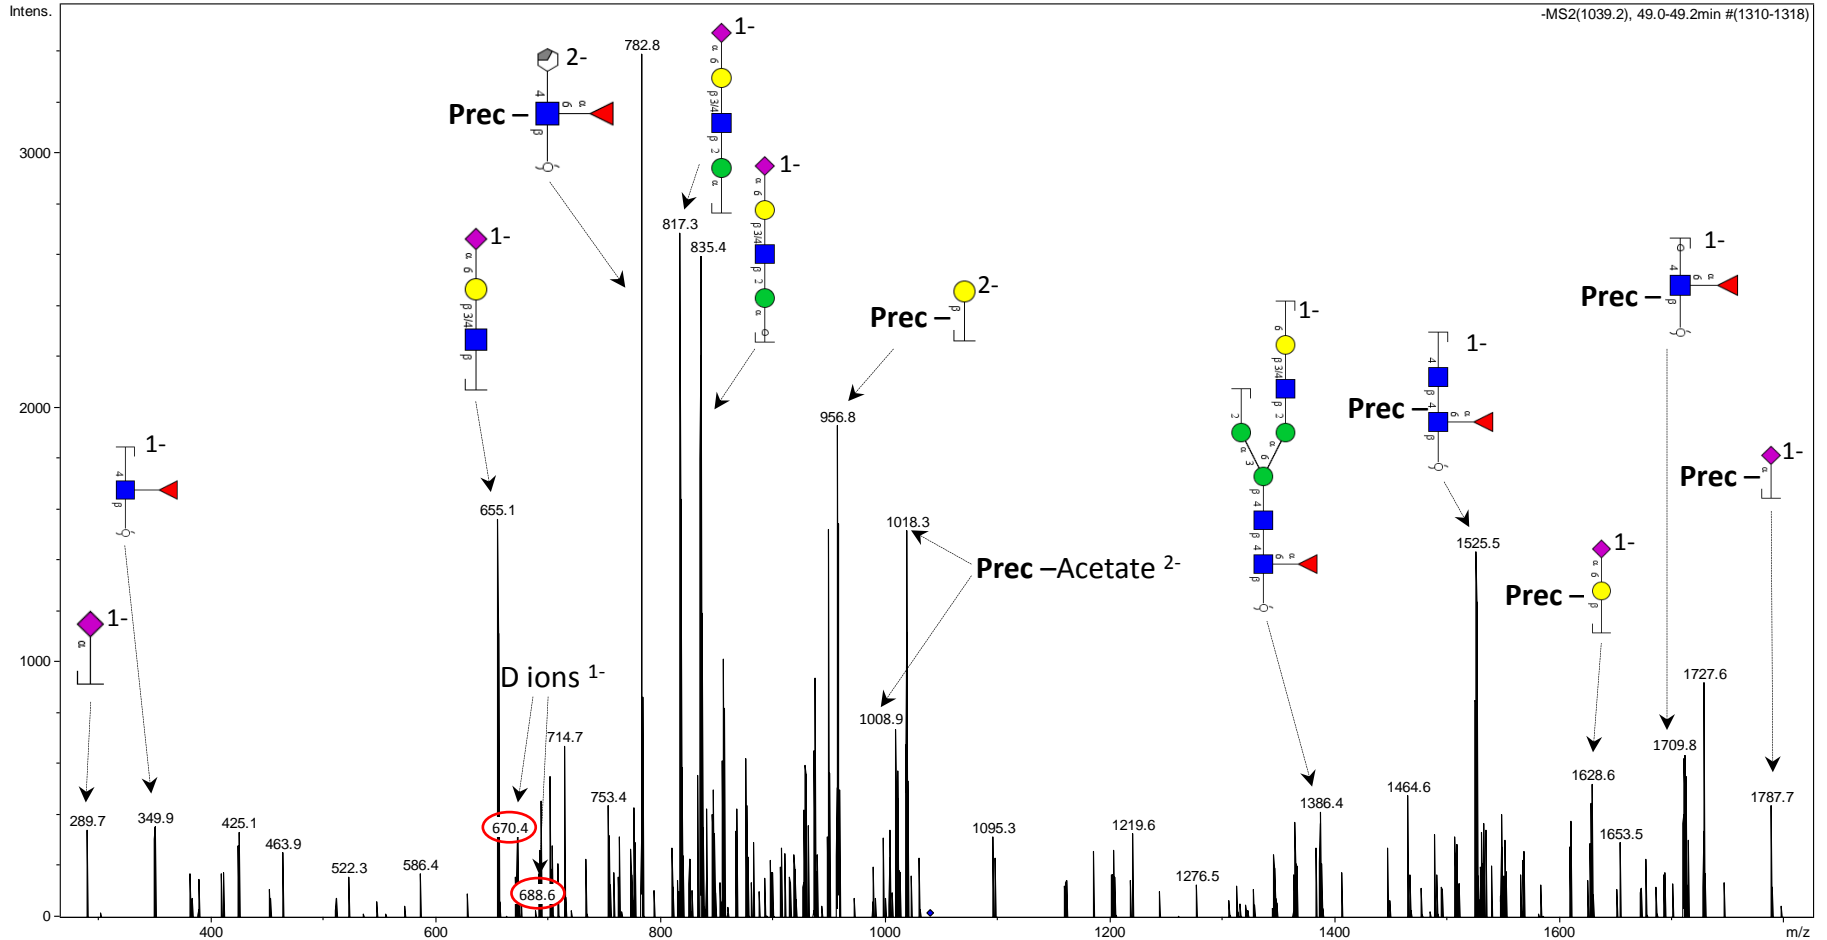

Positive match to MS2 spectrum in UniCarbKB





Glycan No 15a

Precursor =  $m/z$  1111.4<sup>2-</sup>

[M-H]<sup>1-</sup> = 2223.8 Da

LC retention time = 44.3 min

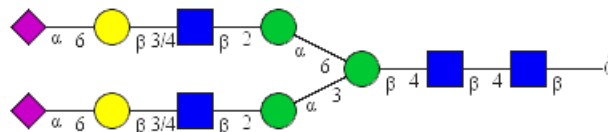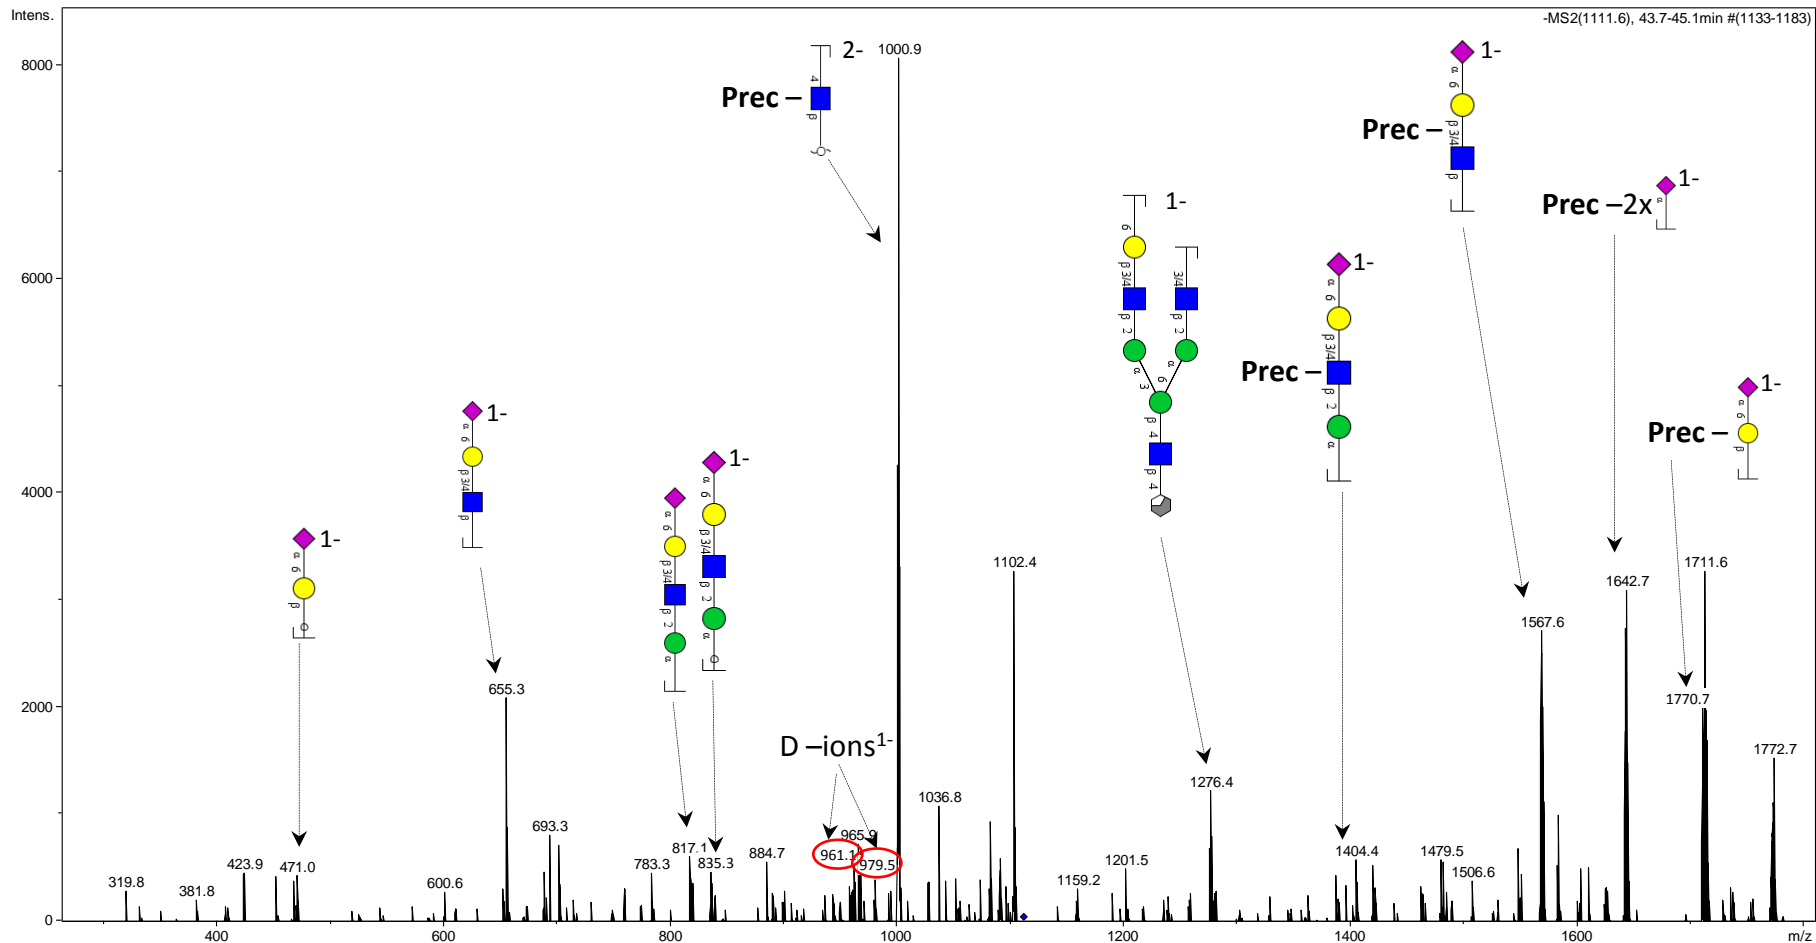

Positive match to MS2 spectrum in UniCarbKB



Glycan No 16

Precursor =  $m/z$  1140.4<sup>2-</sup>

[M-H]<sup>1-</sup> = 2281.8 Da

LC retention time = 42.2 min

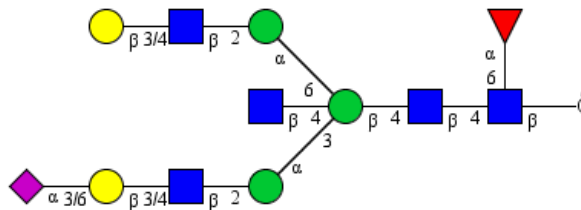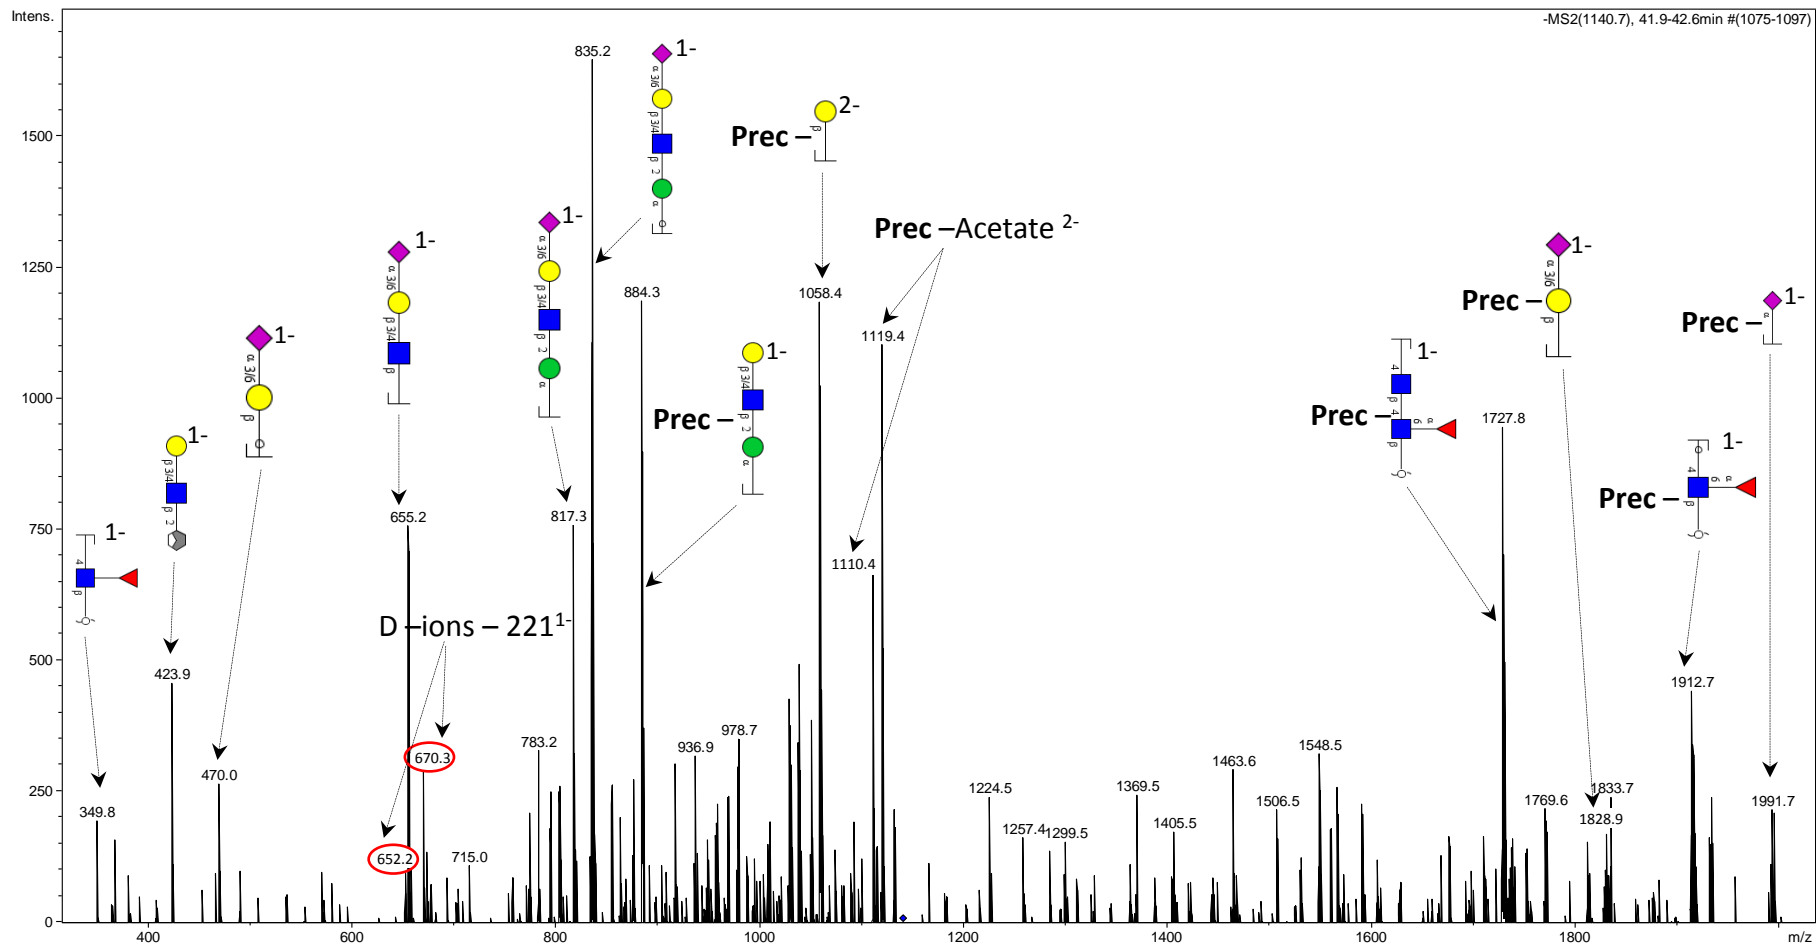

Positive match to MS2 spectrum in UniCarbKB

# Glycan No 17

Precursor =  $m/z$  1148.4<sup>2-</sup>

[M-H]<sup>1-</sup> = 2297.8 Da

LC retention time = 47.4 min

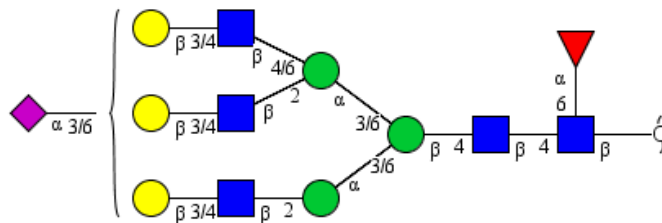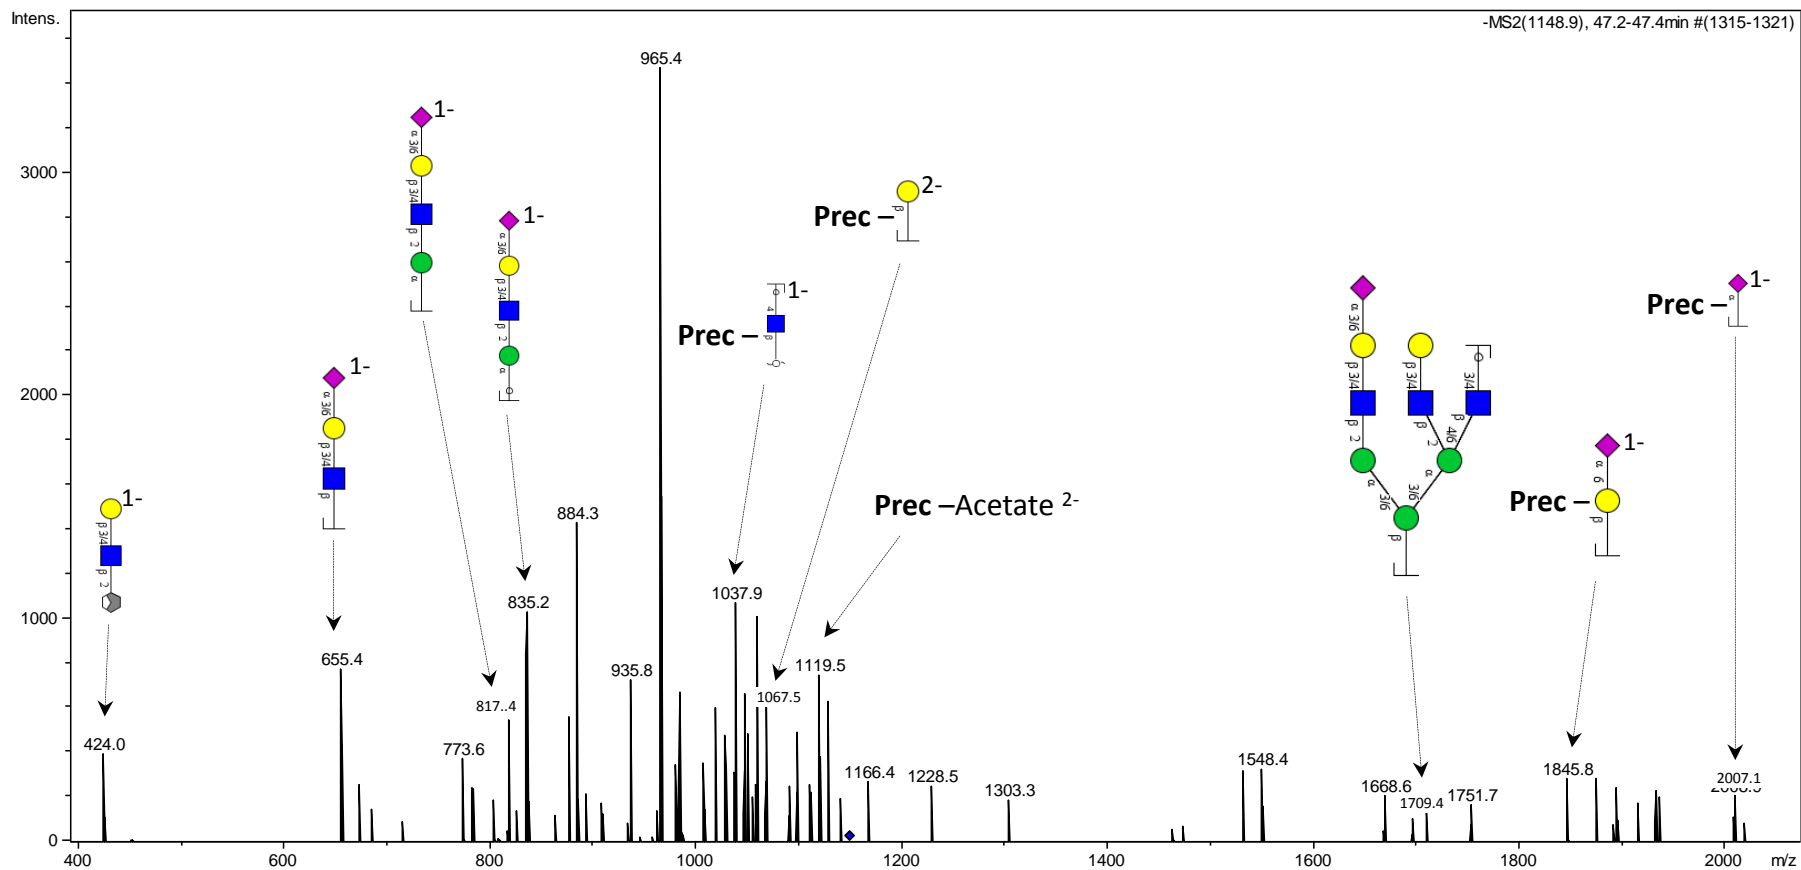

No match to MS2 spectrum in UniCarbKB

Glycan No 18a

Type = Complex

Precursor =  $m/z$  1178.1<sup>3-</sup>

$[M-H]^{1-} = 3536.3$  Da

LC retention time = 57.7 min

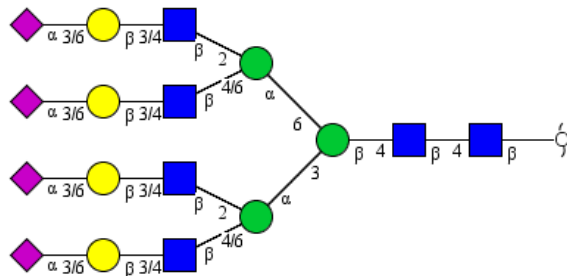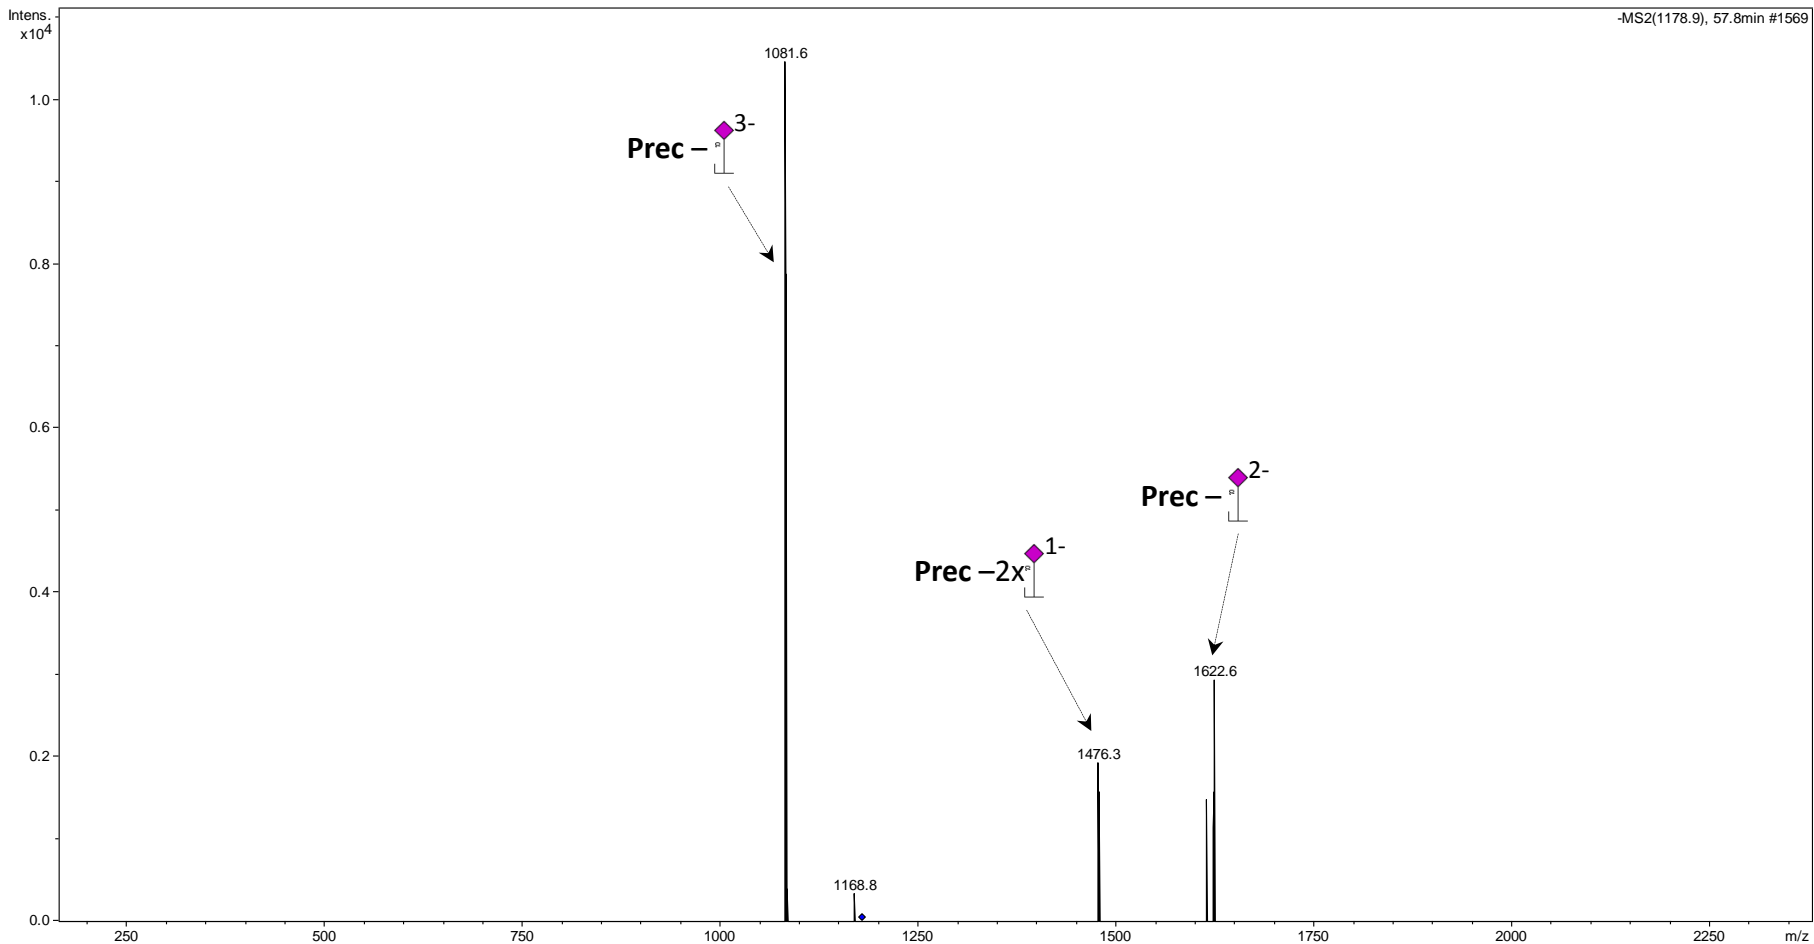

No match to MS2 spectrum in UniCarbKB







Glycan No 19b

Type = Complex

Precursor =  $m/z$  1184.5<sup>2-</sup>

[M-H]<sup>1-</sup> = 2370 Da

LC retention time = 55.6 min

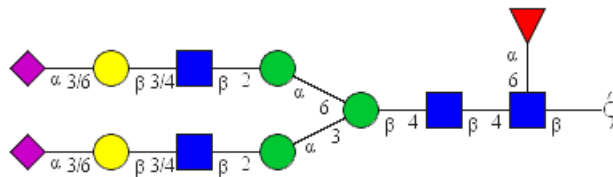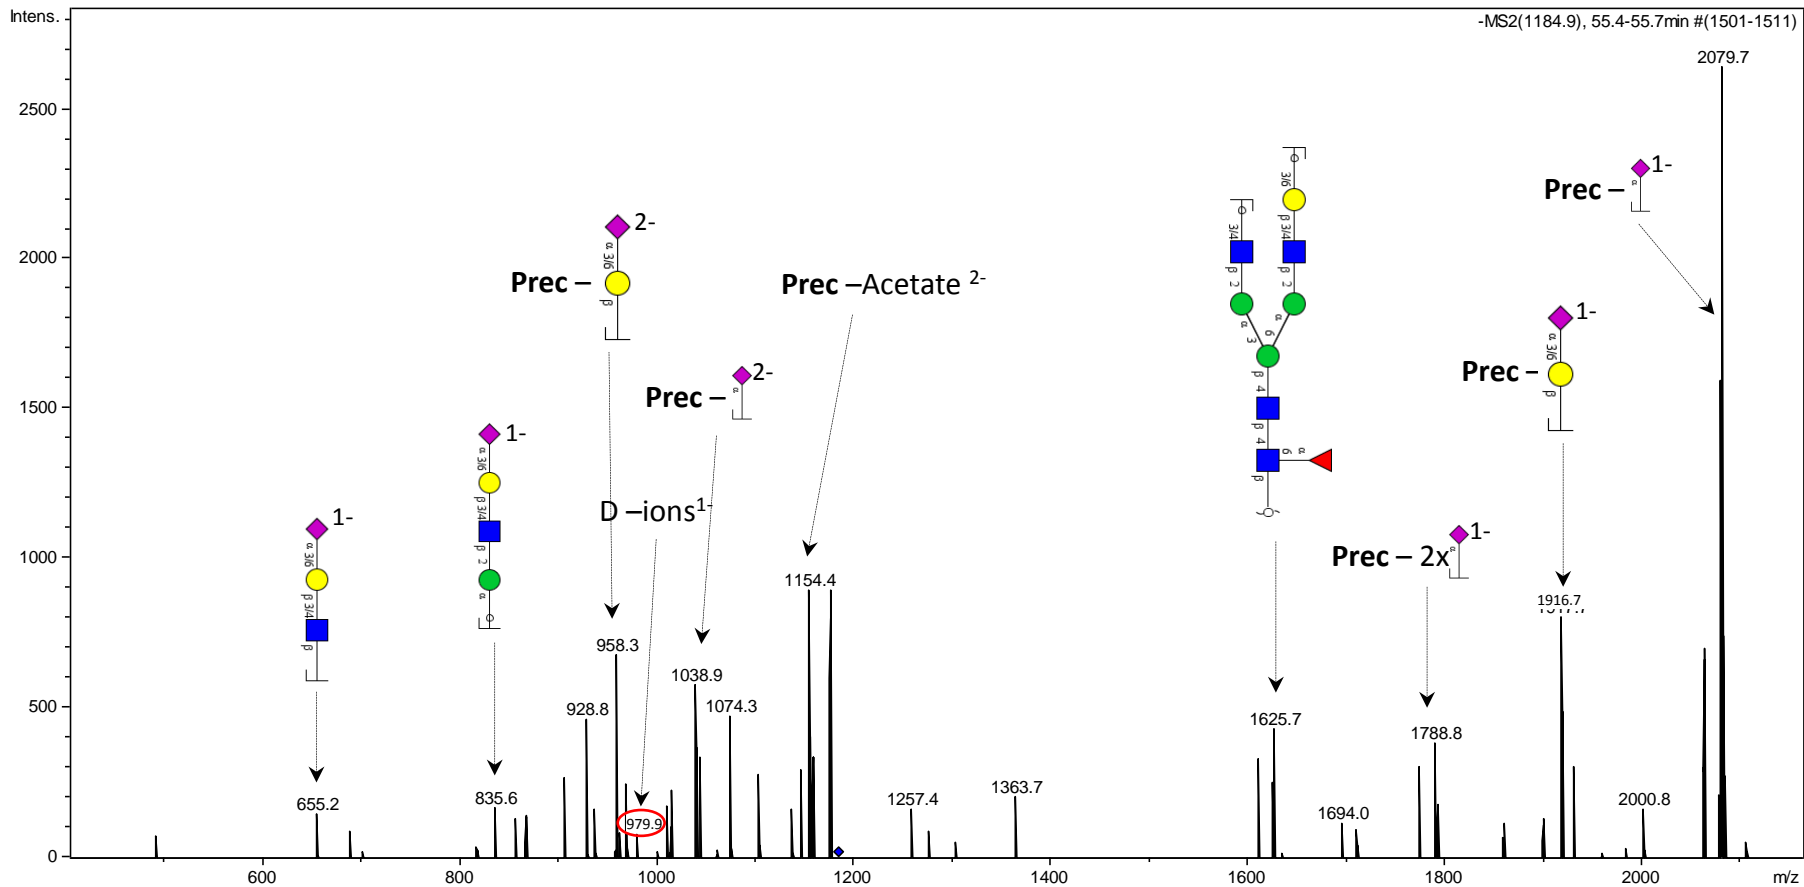

Positive match to MS2 spectrum in UniCarbKB





Glycan No 21a

Precursor =  $m/z$  1294<sup>2-</sup>

[M-H]<sup>1-</sup> = 2589 Da

LC retention time = 49.9 min

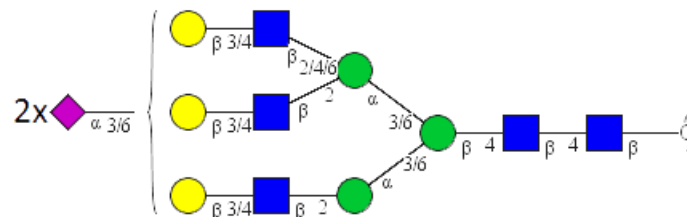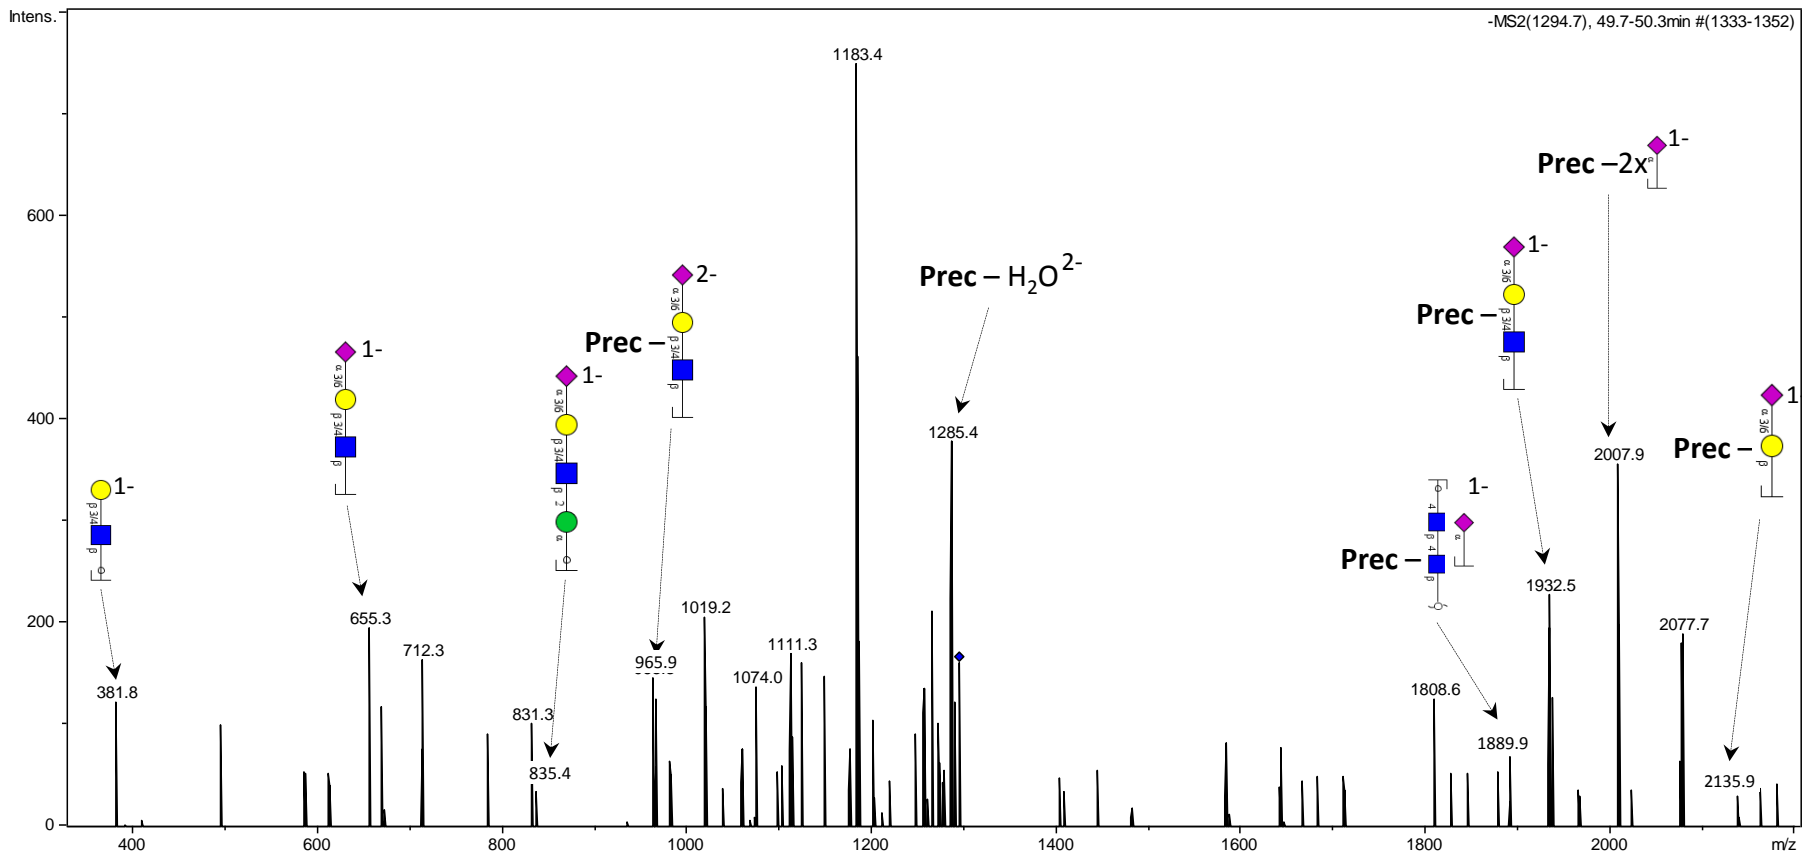



Glycan No 21c

Precursor =  $m/z$  1294<sup>2-</sup>

[M-H]<sup>1-</sup> = 2589 Da

LC retention time = 54.6 min

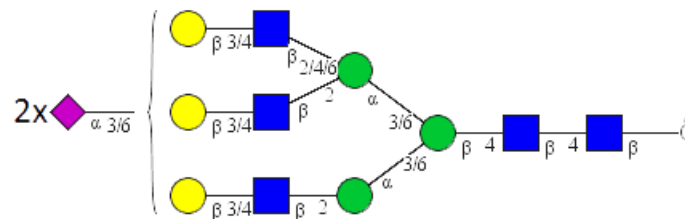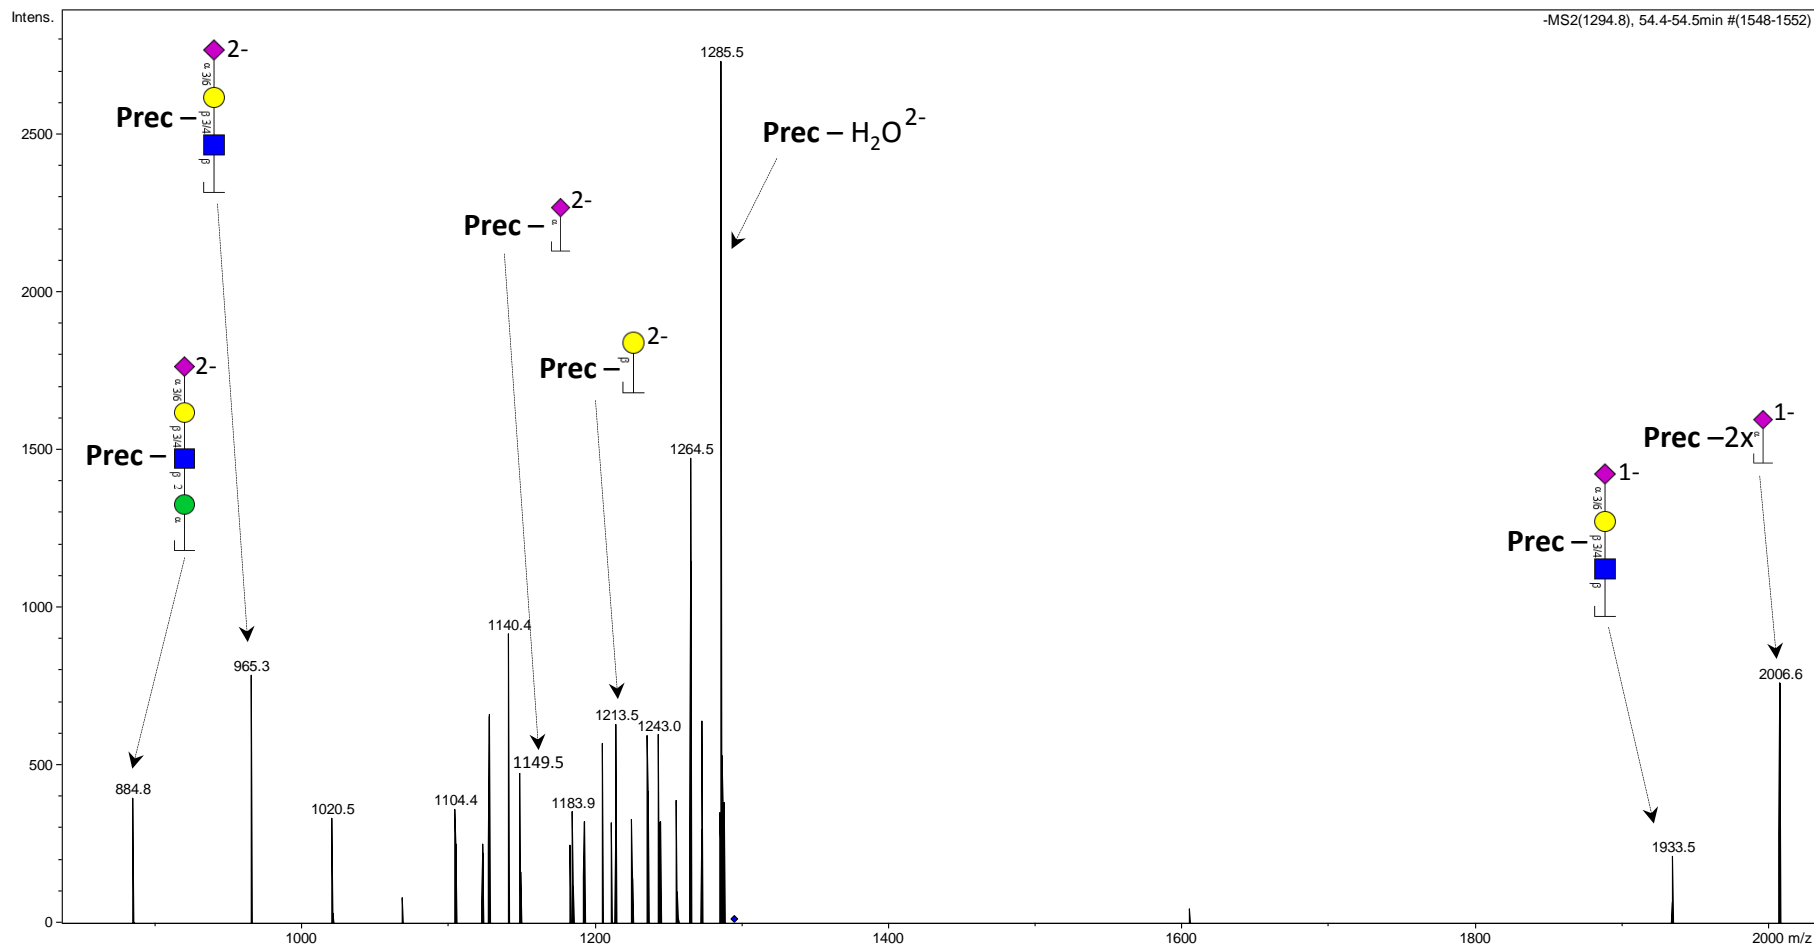

No match to MS2 spectrum in UniCarbKB



Glycan No 22a  
 Type = Complex  
 Precursor =  $m/z$  959.4<sup>3-</sup>  
 $[M-H]^{-1} = 2880.2$ Da  
 LC retention time = 51.2 min

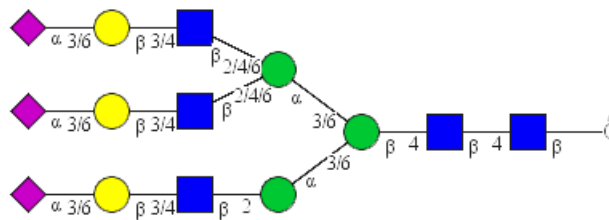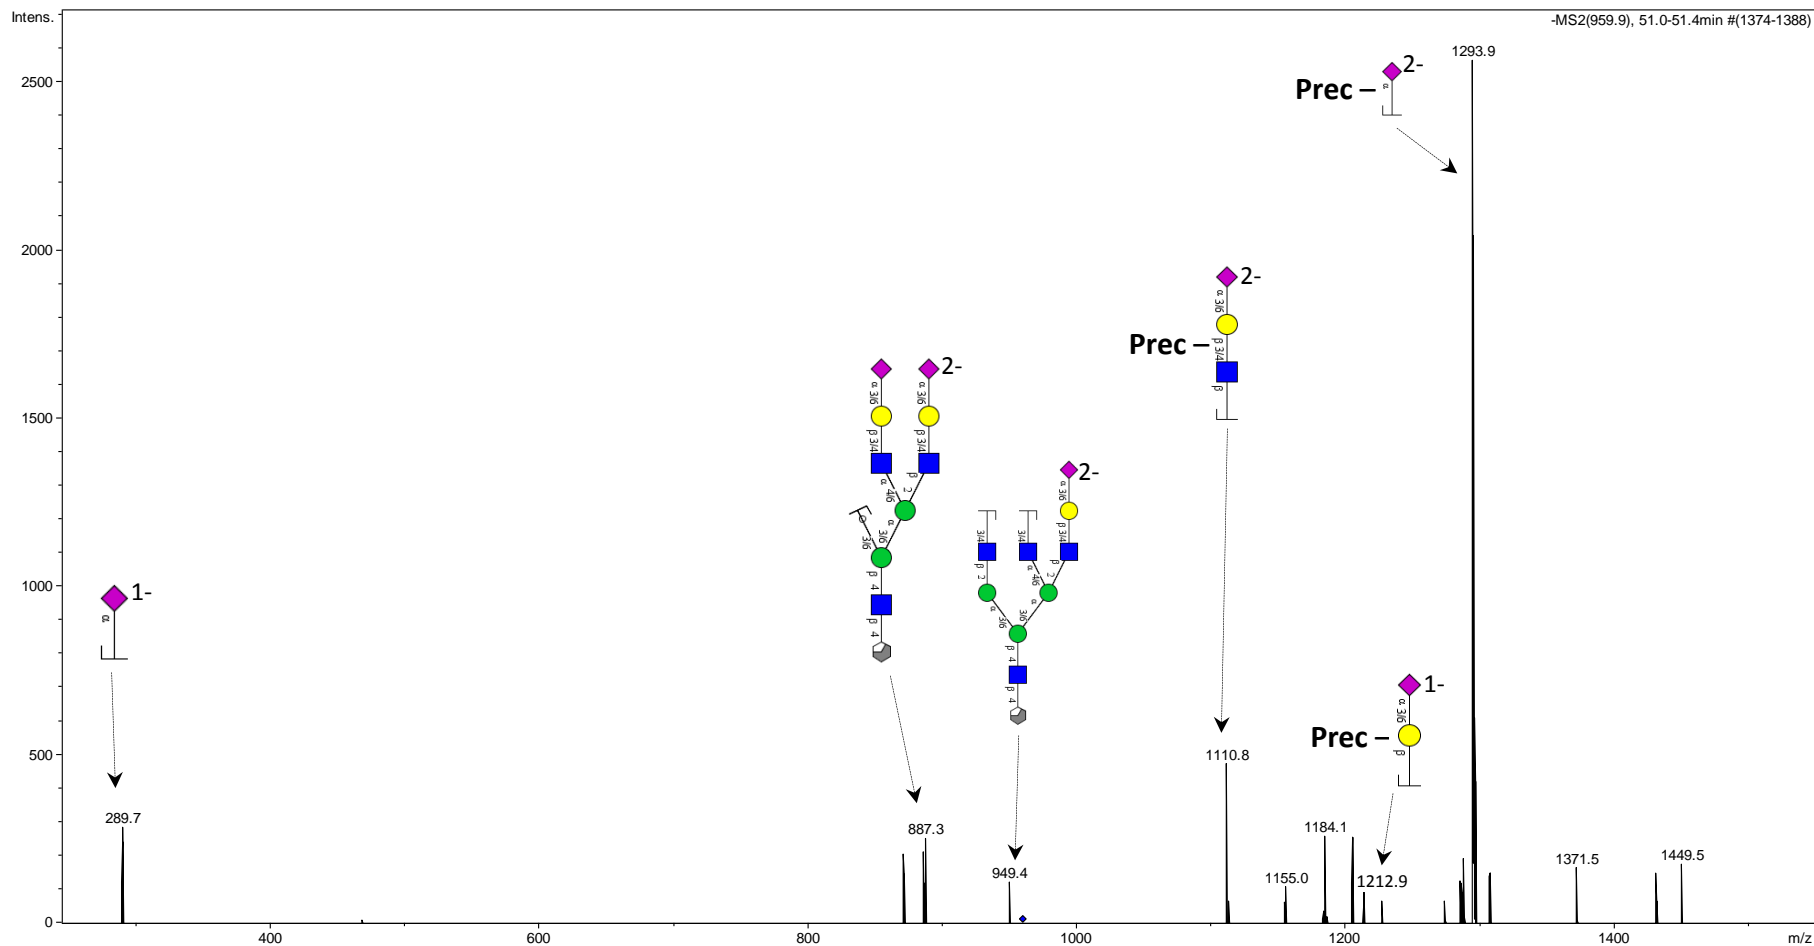

No match to MS2 spectrum in UniCarbKB

Glycan No 22b

Precursor =  $m/z$  959.4<sup>3-</sup>

[M-H]<sup>1-</sup> = 2880.2Da

LC retention time = 53.5 min

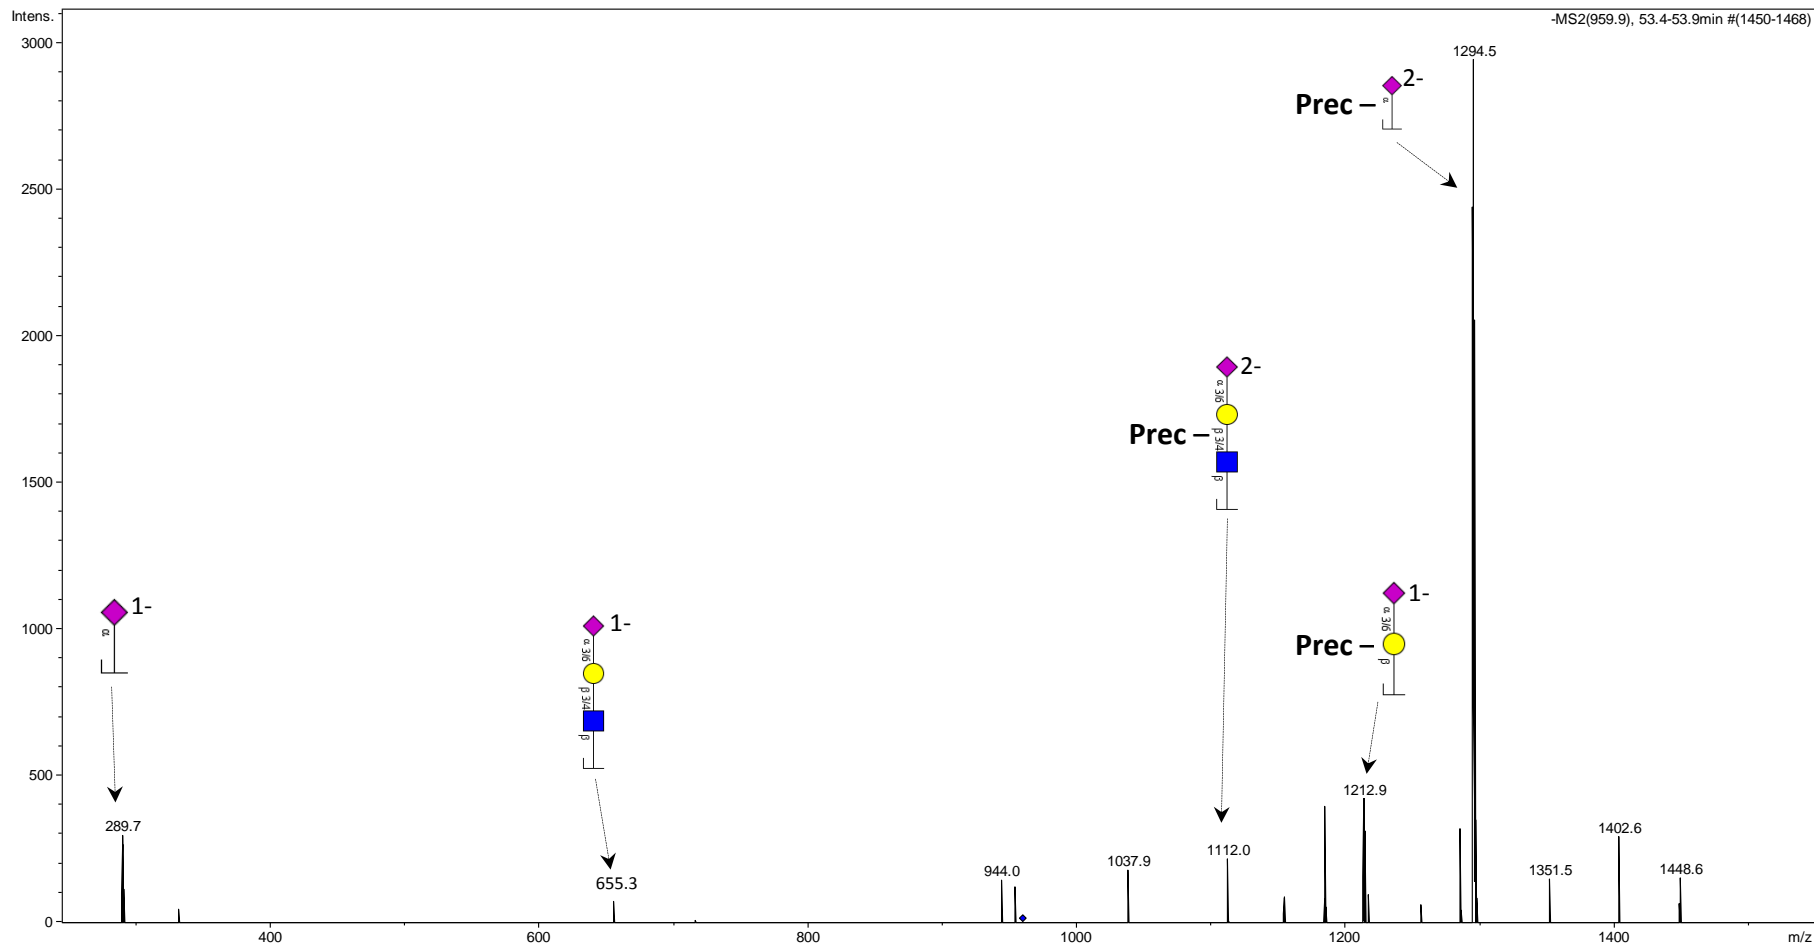

No match to MS2 spectrum in UniCarbKB



Glycan No 23b

Precursor =  $m/z$  1008<sup>3-</sup>

[M-H]<sup>1-</sup> = 3026.2Da

LC retention time = 55.9 min

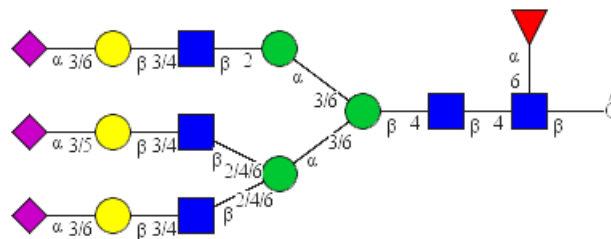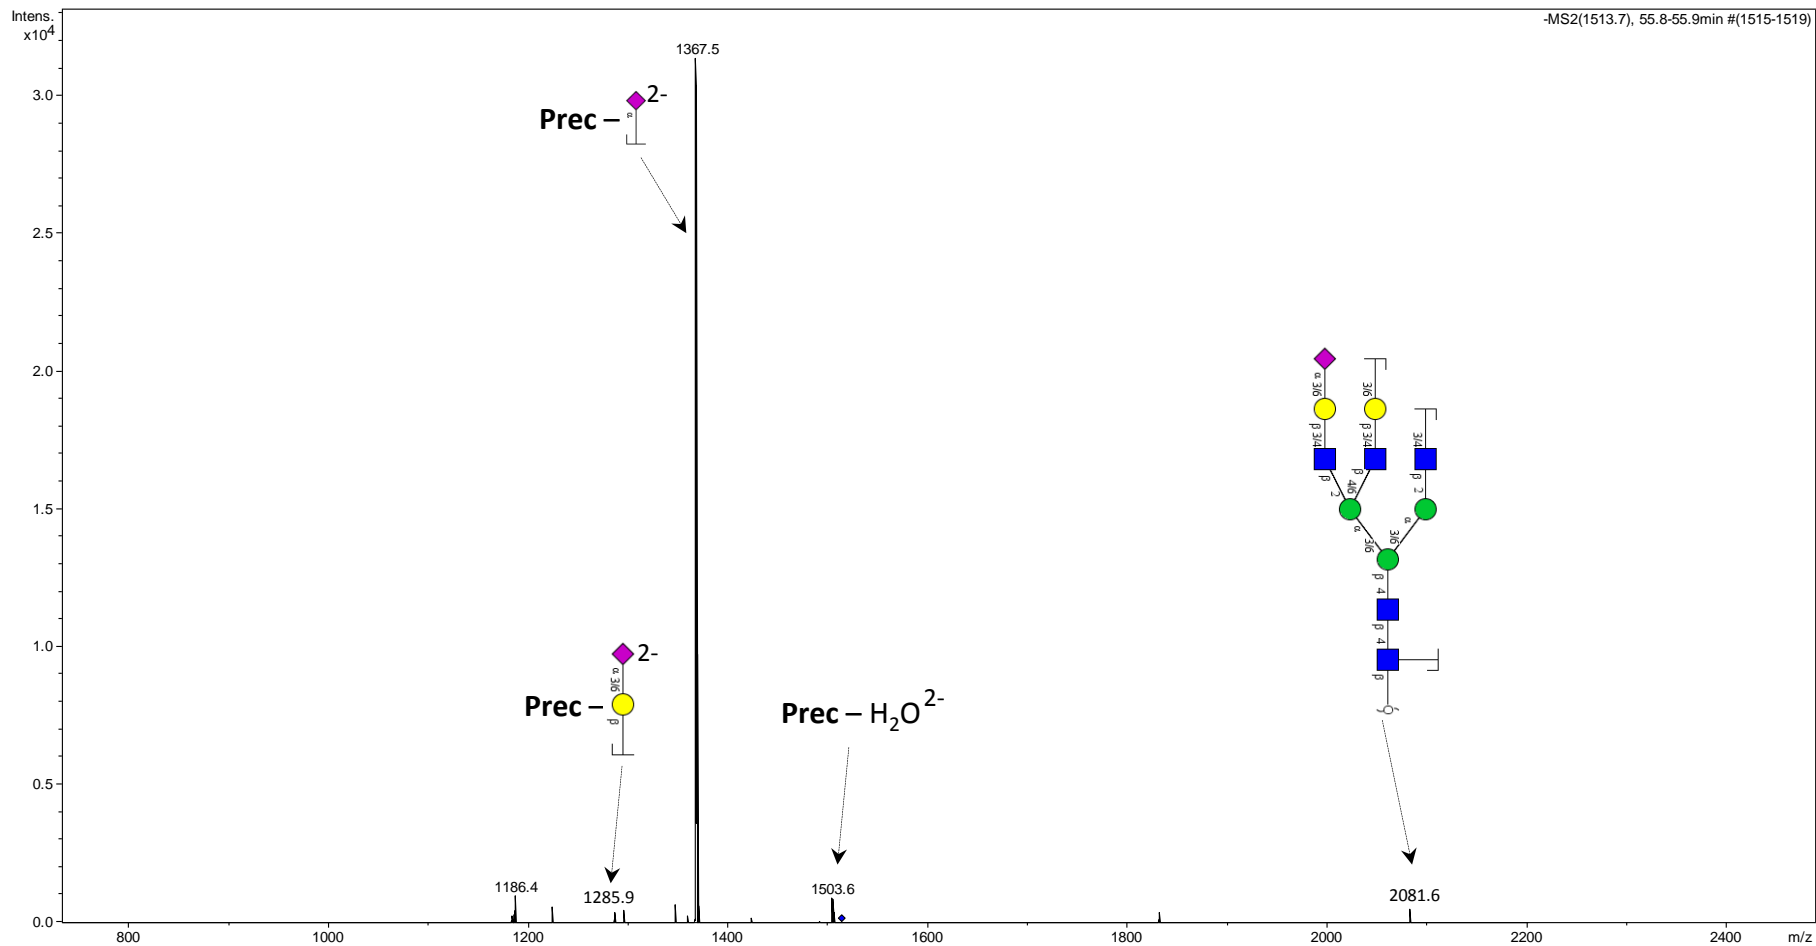

No match to MS2 spectrum in UniCarbKB
