# Supplementary material
Source: PubMed Central journal article supplement (PMC4227548)
Supplement: pr500591e_si_004.pdf [file pr500591e_si_004.pdf]

Associated Content

Supplementary Figure S1

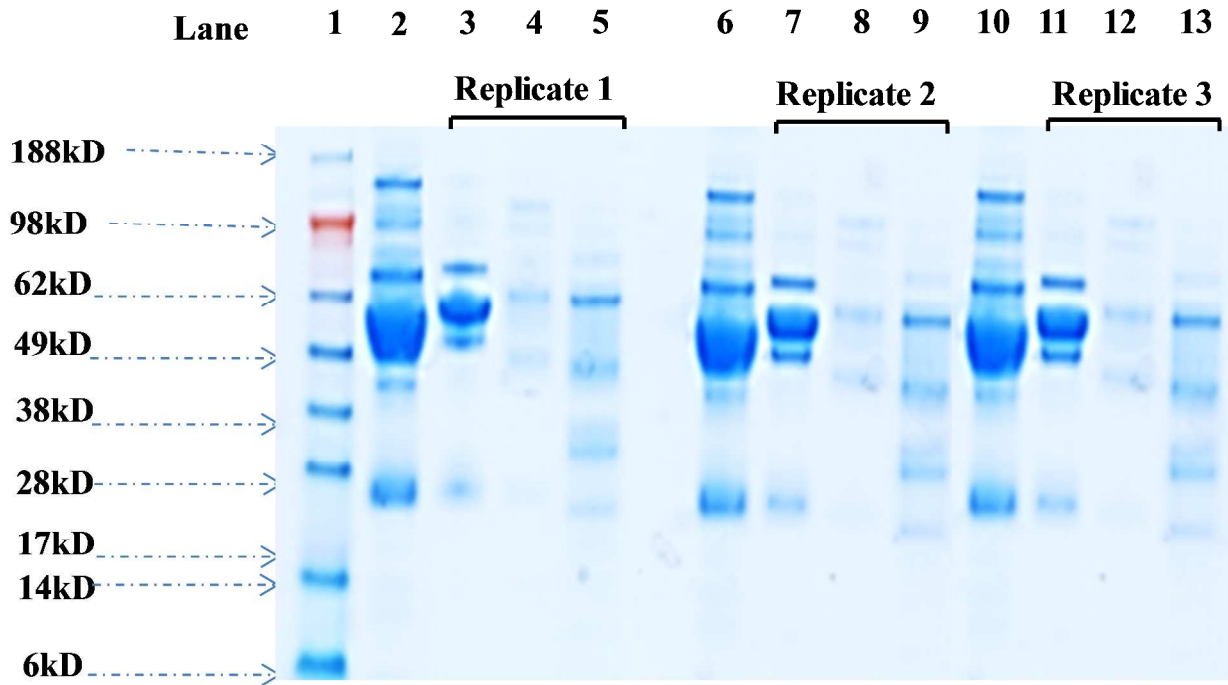

**Supp. Fig S1. ID SDS-PAGE analysis of reference plasma fractions from 12P-M-LAC platform to evaluate reproducibility.**

Equal amounts (2 $\mu$ g) of replicate samples were separated on a 4-12% NuPAGE gel as follows; reference plasma (lanes 2, 6 and 10),

12P bound fraction (lanes 3, 7 and 11), M-LAC bound fraction (lanes 4, 8 and 12), and M-LAC flow-through fraction (lanes 5, 9 and 13).

Lane 1 represents the molecular weight standard marker from Invitrogen (SeeBlue<sup>®</sup> Plus2 Prestained).

## Supplementary Figure S2

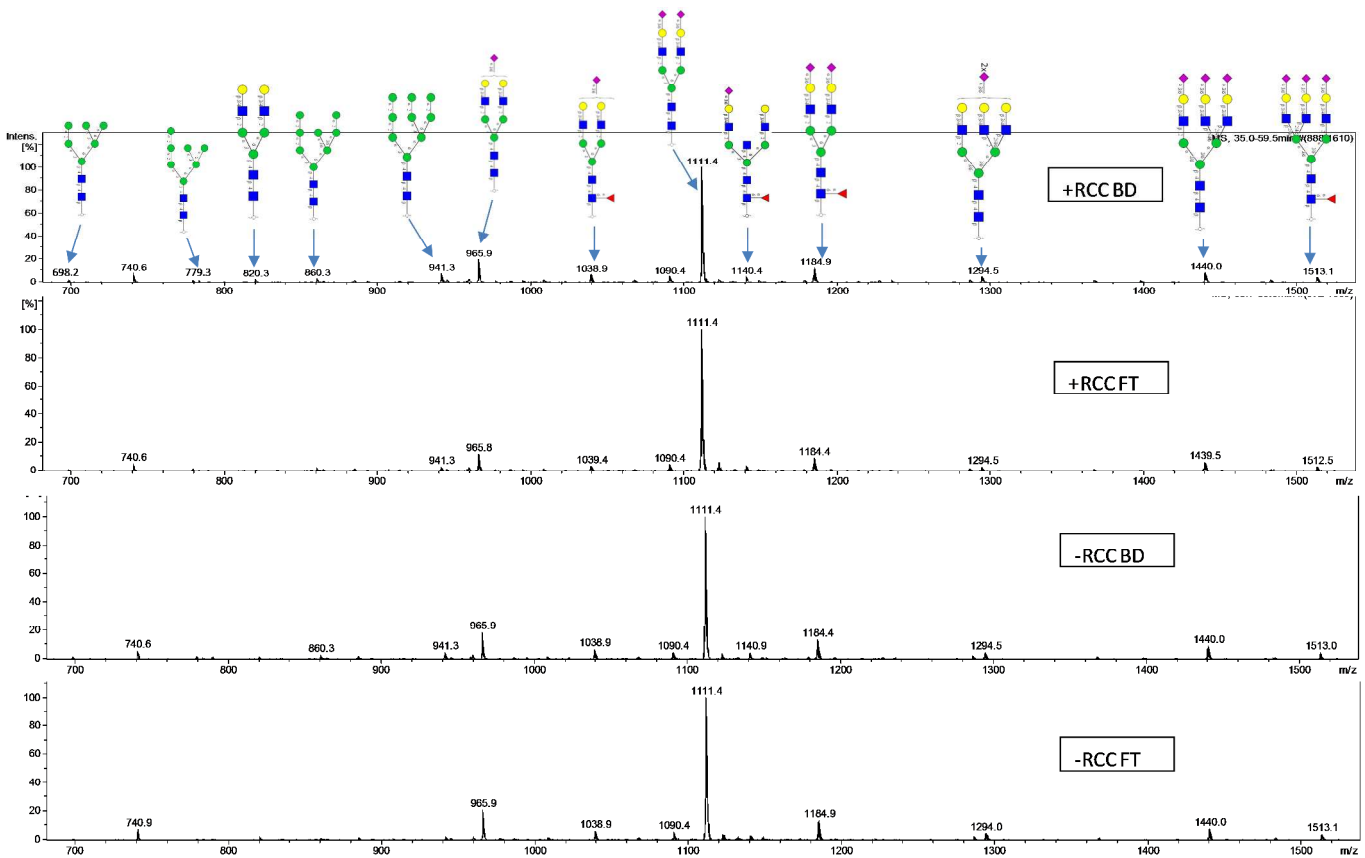

A representative average MS spectral of M-LAC bound and unbound fractions (~35-60min) m/z range 650-1600

**Supplementary Table S1: Patient information of ccRCC plasma samples, average age of patients is 52years**

| Patient ID | Protocol number | Sex    | Tumor size, cm  | Clinical diagnosis |
|------------|-----------------|--------|-----------------|--------------------|
| 38         | 01-130          | Female | 8.5 x 6.3 x 6.0 | ccRCC              |
| 46         | 01-130          | Female | 5.5 x 5.0 x 5.0 | ccRCC              |
| 48         | 01-130          | Male   | 7.2 x 4.0 x 3.0 | ccRCC              |
| 50         | 01-130          | Female | 6.3 x 5.0 x 4.5 | ccRCC              |
| 53         | 01-130          | Male   | 8.0 x 7.0 x 6.0 | ccRCC              |
| 62         | 01-130          | Male   | 7.5 x 7.5 x 6.0 | ccRCC              |
| 64         | 01-130          | Female | 8.2 x 8.0 x 7.2 | ccRCC              |
| 75         | 01-130          | Female | 8.5 x 7.5 x 7.0 | ccRCC              |
| 88         | 01-130          | Female | 3.5 x 3.5 x 3.5 | ccRCC              |
| 108        | 01-130          | Male   | 6.0 x 4.0 x 3.5 | ccRCC              |
| 116        | 01-130          | Male   | 7.5 x 4.5 x 3.0 | ccRCC              |
| 124        | 01-130          | Male   | 8.5 x 6.0 x 5.5 | ccRCC              |
| 135        | 01-131          | Female | 5.5 x 4.0 x 3.0 | ccRCC              |
| 170        | 01-132          | Male   | 6.2 x 5.0 x 3.5 | ccRCC              |
| 192        | 01-130          | Female | 8.0 x 4.5 x 4.0 | ccRCC              |
| 223        | 01-130          | Male   | 7.0 x 6.5 x 5.0 | ccRCC              |
| 235        | 01-130          | Female | 4.5 x 4.5 x 3.0 | ccRCC              |
| 251        | 01-130          | Male   | 5.2 x 5.0 x 4.5 | ccRCC              |
| 253        | 01-130          | Male   | 4.7 x 4.2 x 4.0 | ccRCC              |
| 261        | 01-130          | Female | 8.2 x 7.5 x 6.0 | ccRCC              |

**Supplementary Table S3: Details of the number of total peptides and proteins identified from two analytical replicates**

**Proteomics**

| Sample         | Total peptides* | Total proteins |
|----------------|-----------------|----------------|
| Disease (+RCC) | 4063            | 159            |
| Control (-RCC) | 3112            | 151            |

**Glycoproteomics**

|                | M-LAC Unbound fraction |                | M-LAC Bound fraction |                |
|----------------|------------------------|----------------|----------------------|----------------|
| Sample         | Total peptides*        | Total proteins | Total peptides*      | Total proteins |
| Disease (+RCC) | 3221                   | 147            | 1598                 | 86             |
| Control (-RCC) | 2404                   | 125            | 1437                 | 88             |

\*average spectral count of two analytical replicates, only proteins with  $\geq 2$  unique peptides are included in the data
